# Supplementary material
Source: PubMed Central journal article supplement (PMC5444119)
Supplement: AAC.02397-16_zac006176252s1.pdf [file AAC.02397-16_zac006176252s1.pdf]

## **Supplemental Tables**

**Click chemistry-facilitated structural diversification of nitrothiazoles,  
nitrofurans and nitropyrroles enhances antimicrobial activity  
against *Giardia lamblia***

Wan Jung Kim, Keith Korthals, Suhua Li, Christine Le, Jaroslaw Kalisiak,  
K. Barry Sharpless, Valery V. Fokin, Yukiko Miyamoto, and Lars Eckmann

**Table S1. Alkynes used in study**

| Name | Structure | Name | Structure | Name | Structure |
|------|-----------|------|-----------|------|-----------|
| 101  |           | 122  |           | 143  |           |
| 102  |           | 123  |           | 144  |           |
| 103  |           | 124  |           | 145  |           |
| 104  |           | 125  |           | 146  |           |
| 105  |           | 126  |           | 147  |           |
| 106  |           | 127  |           | 148  |           |
| 107  |           | 128  |           | 149  |           |
| 108  |           | 129  |           | 150  |           |
| 109  |           | 130  |           | 151  |           |
| 110  |           | 131  |           | 152  |           |

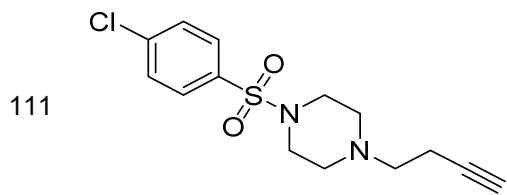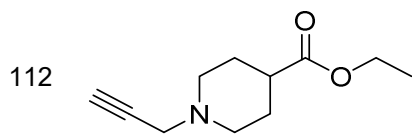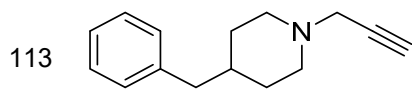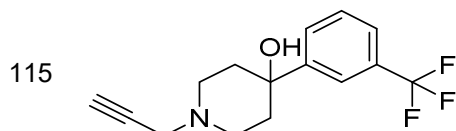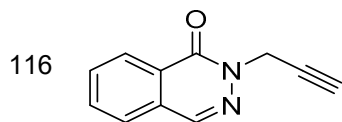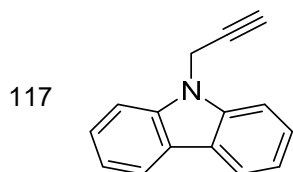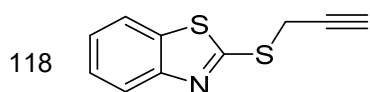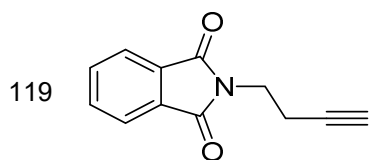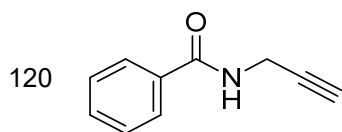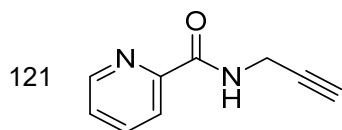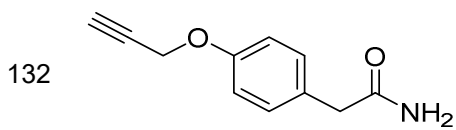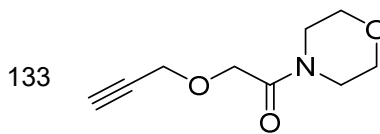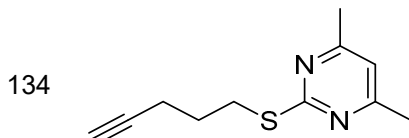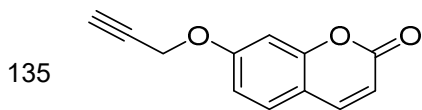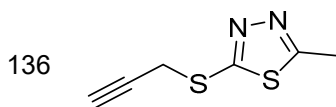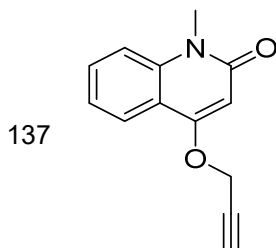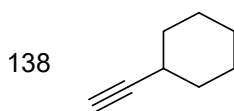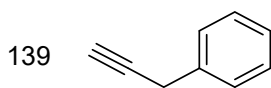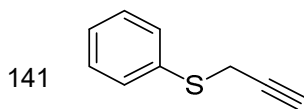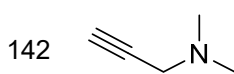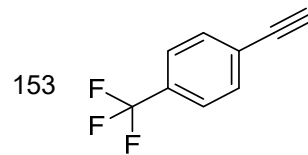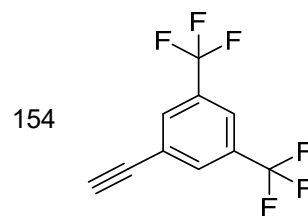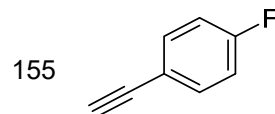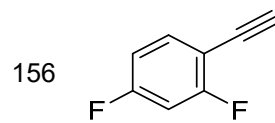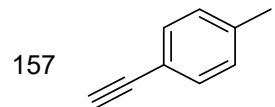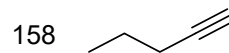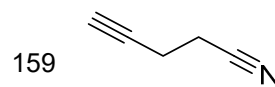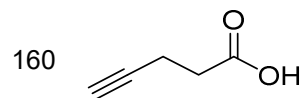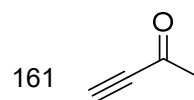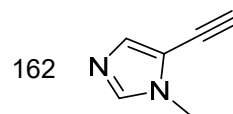

Table S1. Continued

| Name | Structure | Name | Structure | Name | Structure |
|------|-----------|------|-----------|------|-----------|
| 163  |           | 221  |           | 242  |           |
| 201  |           | 222  |           | 243  |           |
| 202  |           | 223  |           | 244  |           |
| 203  |           | 224  |           | 245  |           |
| 204  |           | 225  |           | 247  |           |
| 205  |           | 226  |           | 301  |           |
| 206  |           | 227  |           | 302  |           |
| 207  |           | 228  |           | 303  |           |
| 208  |           | 229  |           | 304  |           |
| 209  |           | 230  |           | 305  |           |

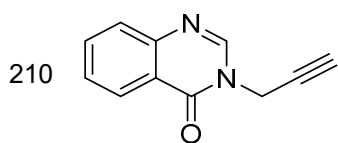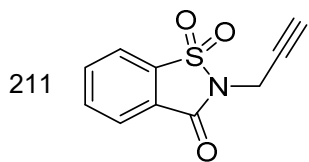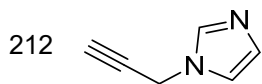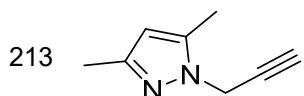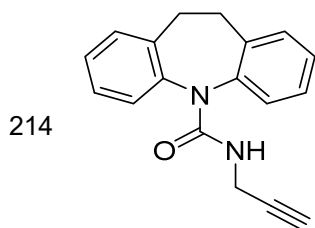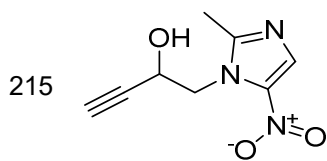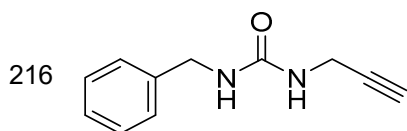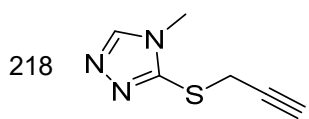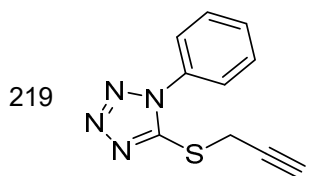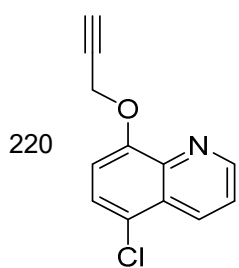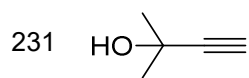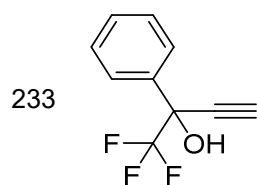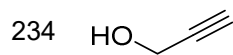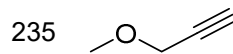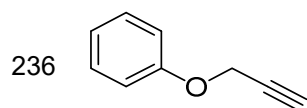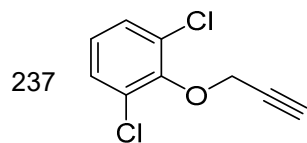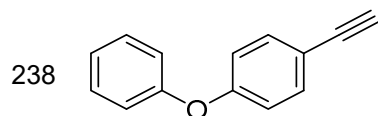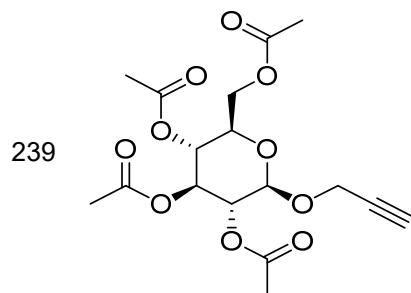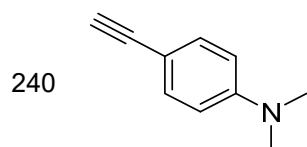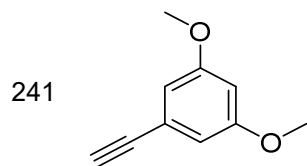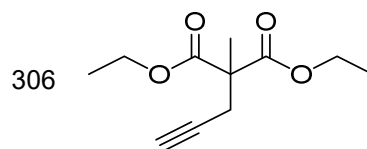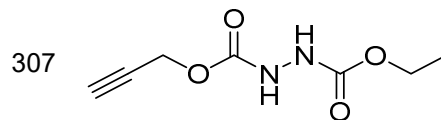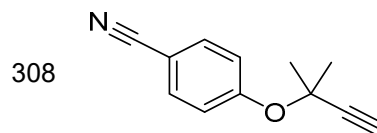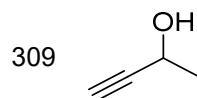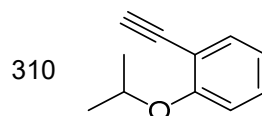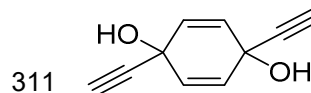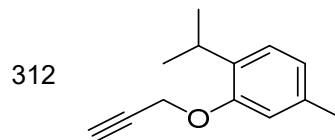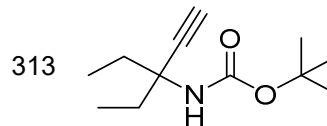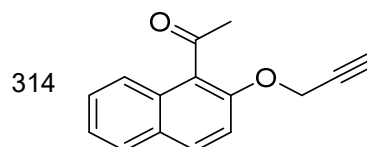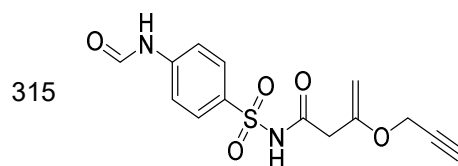

Table S1. Continued

| Name | Structure                                                                           | Name | Structure                                                                            | Name | Structure                                                                             |
|------|-------------------------------------------------------------------------------------|------|--------------------------------------------------------------------------------------|------|---------------------------------------------------------------------------------------|
| 316  | 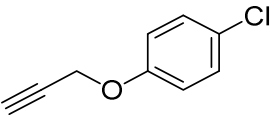   | 331  |     | 343  |    |
| 317  |    | 332  |     | 344  |    |
| 318  |    | 333  |     | 345  |    |
| 319  |    | 334  |     | 346  |    |
| 320  |   | 335  |    | 347  |    |
| 323  |  | 336  |   | 348  |  |
| 324  |  | 337  |   | 350  |  |
| 325  |  | 338  |  | 351  |  |
| 326  |  | 339  |   | 352  |  |

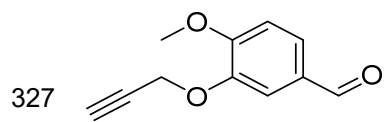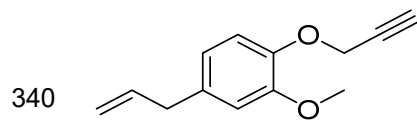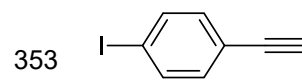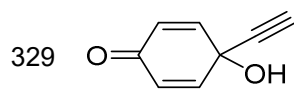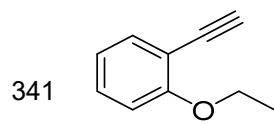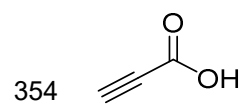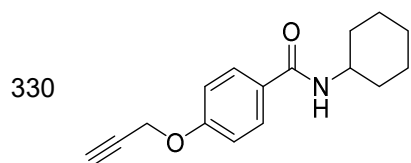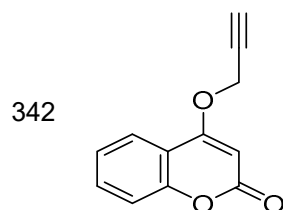

**Table S2. Antigiardial activity and cytotoxicity of new nitrothiazoles**

| Name  | Mz <sup>S</sup> <i>G. lamblia</i> |           |             |           | Mz <sup>R</sup> <i>G. lamblia</i> |           |             |           | HeLa        |           |
|-------|-----------------------------------|-----------|-------------|-----------|-----------------------------------|-----------|-------------|-----------|-------------|-----------|
|       | 713                               |           | 106         |           | 713M3                             |           | WB-M2       |           | pCC50       | CC50 (μM) |
|       | pEC50                             | EC50 (μM) | pEC50       | EC50 (μM) | pEC50                             | EC50 (μM) | pEC50       | EC50 (μM) |             |           |
| Ntz   | 5.55 ± 0.04                       | 2.81      | 5.29 ± 0.18 | 5.12      | 4.66 ± 0.20                       | 21.82     | 4.43 ± 0.09 | 37.11     | < 4.30      | > 50      |
| G-101 | 6.53 ± 0.37                       | 0.30      | 6.02 ± 0.18 | 0.95      | 5.32 ± 0.26                       | 4.81      | 4.75 ± 0.03 | 17.95     | < 4.30      | > 50      |
| G-103 | 6.41 ± 0.08                       | 0.39      | 6.04 ± 0.17 | 0.92      | 5.76 ± 0.30                       | 1.75      | 4.94 ± 0.07 | 11.43     | < 4.30      | > 50      |
| G-104 | 7.18 ± 0.10                       | 0.07      | 6.64 ± 0.18 | 0.23      | 5.81 ± 0.28                       | 1.56      | 5.34 ± 0.09 | 4.59      | < 4.30      | > 50      |
| G-105 | 6.12 ± 0.08                       | 0.76      | 5.82 ± 0.18 | 1.52      | 5.33 ± 0.17                       | 4.72      | 4.84 ± 0.05 | 14.32     | < 4.30      | > 50      |
| G-107 | 5.99 ± 0.07                       | 1.02      | 5.48 ± 0.06 | 3.31      | 5.49 ± 0.28                       | 3.24      | 4.88 ± 0.04 | 13.26     | < 4.30      | > 50      |
| G-108 | 6.60 ± 0.16                       | 0.25      | 6.28 ± 0.24 | 0.52      | 5.59 ± 0.18                       | 2.58      | 5.06 ± 0.09 | 8.71      | < 4.30      | > 50      |
| G-109 | 5.94 ± 0.09                       | 1.16      | 5.78 ± 0.07 | 1.65      | 5.53 ± 0.24                       | 2.92      | 4.98 ± 0.02 | 10.47     | < 4.30      | > 50      |
| G-110 | 5.72 ± 0.12                       | 1.92      | 5.65 ± 0.14 | 2.25      | 5.51 ± 0.23                       | 3.06      | 4.84 ± 0.05 | 14.52     | < 4.30      | > 50      |
| G-111 | 5.60 ± 0.11                       | 2.49      | 5.32 ± 0.20 | 4.81      | 5.22 ± 0.21                       | 6.08      | 4.92 ± 0.08 | 12.13     | < 4.30      | > 50      |
| G-112 | 6.80 ± 0.06                       | 0.16      | 6.85 ± 0.18 | 0.14      | 5.95 ± 0.21                       | 1.12      | 5.69 ± 0.07 | 2.07      | < 4.30      | > 50      |
| G-113 | 6.26 ± 0.04                       | 0.55      | 6.14 ± 0.11 | 0.72      | 5.60 ± 0.23                       | 2.54      | 5.07 ± 0.11 | 8.59      | < 4.30      | > 50      |
| G-115 | 5.94 ± 0.25                       | 1.14      | 5.42 ± 0.20 | 3.83      | 5.37 ± 0.17                       | 4.31      | 4.78 ± 0.08 | 16.53     | < 4.30      | > 50      |
| G-116 | 6.48 ± 0.26                       | 0.33      | 5.90 ± 0.18 | 1.27      | 5.49 ± 0.31                       | 3.22      | 4.73 ± 0.03 | 18.54     | < 4.30      | > 50      |
| G-118 | 6.42 ± 0.16                       | 0.38      | 5.27 ± 0.14 | 5.37      | 5.29 ± 0.21                       | 5.18      | 4.78 ± 0.05 | 16.60     | < 4.30      | > 50      |
| G-119 | 7.21 ± 0.00                       | 0.06      | 6.52 ± 0.18 | 0.30      | 5.76 ± 0.22                       | 1.75      | 5.42 ± 0.05 | 3.83      | < 4.30      | > 50      |
| G-120 | 5.90 ± 0.27                       | 1.25      | 5.12 ± 0.22 | 7.63      | 5.38 ± 0.25                       | 4.22      | 4.78 ± 0.05 | 16.66     | < 4.30      | > 50      |
| G-121 | 6.88 ± 0.04                       | 0.13      | 6.28 ± 0.21 | 0.52      | 5.54 ± 0.23                       | 2.90      | 5.24 ± 0.07 | 5.73      | < 4.30      | > 50      |
| G-122 | 6.46 ± 0.25                       | 0.35      | 5.50 ± 0.09 | 3.14      | 5.36 ± 0.24                       | 4.39      | 4.84 ± 0.05 | 14.62     | < 4.30      | > 50      |
| G-123 | 7.08 ± 0.04                       | 0.08      | 6.72 ± 0.21 | 0.19      | 5.90 ± 0.14                       | 1.25      | 5.40 ± 0.07 | 4.00      | < 4.30      | > 50      |
| G-124 | 6.96 ± 0.20                       | 0.11      | 6.62 ± 0.22 | 0.24      | 6.00 ± 0.21                       | 1.00      | 5.76 ± 0.09 | 1.74      | < 4.30      | > 50      |
| G-128 | 6.33 ± 0.30                       | 0.47      | 5.15 ± 0.25 | 7.13      | 4.93 ± 0.10                       | 11.75     | 4.79 ± 0.04 | 16.28     | < 4.30      | > 50      |
| G-129 | 6.90 ± 0.47                       | 0.12      | 7.15 ± 0.13 | 0.07      | 6.38 ± 0.22                       | 0.42      | 5.71 ± 0.15 | 1.95      | < 4.30      | > 50      |
| G-131 | 6.54 ± 0.45                       | 0.29      | 6.85 ± 0.19 | 0.14      | 7.13 ± 0.25                       | 0.07      | 5.40 ± 0.25 | 4.03      | < 4.30      | > 50      |
| G-132 | 6.76 ± 0.26                       | 0.17      | 6.58 ± 0.20 | 0.26      | 5.83 ± 0.18                       | 1.47      | 5.29 ± 0.08 | 5.17      | < 4.30      | > 50      |
| G-133 | 6.94 ± 0.31                       | 0.11      | 6.07 ± 0.15 | 0.86      | 5.65 ± 0.17                       | 2.24      | 5.27 ± 0.12 | 5.35      | < 4.30      | > 50      |
| G-134 | 6.63 ± 0.04                       | 0.23      | 6.53 ± 0.19 | 0.30      | 5.99 ± 0.21                       | 1.02      | 5.17 ± 0.11 | 6.79      | < 4.30      | > 50      |
| G-135 | 5.94 ± 0.21                       | 1.15      | 5.92 ± 0.27 | 1.19      | 5.35 ± 0.23                       | 4.44      | 4.85 ± 0.05 | 14.29     | < 4.30      | > 50      |
| G-136 | 6.08 ± 0.08                       | 0.84      | 5.86 ± 0.10 | 1.40      | 5.78 ± 0.22                       | 1.67      | 5.02 ± 0.13 | 9.48      | < 4.30      | > 50      |
| G-137 | 6.05 ± 0.09                       | 0.90      | 6.09 ± 0.11 | 0.82      | 6.30 ± 0.25                       | 0.50      | 4.94 ± 0.11 | 11.57     | < 4.30      | > 50      |
| G-138 | 7.20 ± 0.07                       | 0.06      | 5.84 ± 0.19 | 1.44      | 5.34 ± 0.26                       | 4.61      | 4.90 ± 0.03 | 12.59     | < 4.30      | > 50      |
| G-139 | 6.27 ± 0.56                       | 0.54      | 6.25 ± 0.11 | 0.56      | 5.88 ± 0.21                       | 1.32      | 5.47 ± 0.11 | 3.41      | < 4.30      | > 50      |
| G-141 | 6.88 ± 0.08                       | 0.13      | 5.79 ± 0.11 | 1.61      | 5.19 ± 0.23                       | 6.43      | 4.86 ± 0.03 | 13.68     | < 4.30      | > 50      |
| G-143 | 6.99 ± 0.11                       | 0.10      | 6.56 ± 0.15 | 0.27      | 5.76 ± 0.23                       | 1.75      | 5.19 ± 0.06 | 6.49      | < 4.30      | > 50      |
| G-144 | 6.67 ± 0.22                       | 0.21      | 6.16 ± 0.11 | 0.70      | 5.40 ± 0.16                       | 3.98      | 4.98 ± 0.02 | 10.57     | < 4.30      | > 50      |
| G-145 | 6.39 ± 0.31                       | 0.40      | 5.75 ± 0.05 | 1.76      | 5.55 ± 0.28                       | 2.82      | 5.22 ± 0.22 | 6.08      | < 4.30      | > 50      |
| G-146 | 6.19 ± 0.26                       | 0.65      | 5.42 ± 0.11 | 3.82      | 5.46 ± 0.25                       | 3.47      | 4.77 ± 0.05 | 16.83     | < 4.30      | > 50      |
| G-147 | 6.95 ± 0.11                       | 0.11      | 6.30 ± 0.17 | 0.50      | 5.38 ± 0.19                       | 4.15      | 5.00 ± 0.06 | 9.95      | < 4.30      | > 50      |
| G-148 | 7.06 ± 0.17                       | 0.09      | 5.90 ± 0.13 | 1.26      | 5.34 ± 0.20                       | 4.57      | 4.83 ± 0.06 | 14.66     | < 4.30      | > 50      |
| G-149 | 7.17 ± 0.03                       | 0.07      | 6.11 ± 0.12 | 0.78      | 5.53 ± 0.15                       | 2.95      | 4.99 ± 0.07 | 10.14     | < 4.30      | > 50      |
| G-150 | 7.52 ± 0.25                       | 0.03      | 7.00 ± 0.28 | 0.10      | 6.27 ± 0.23                       | 0.54      | 6.33 ± 0.27 | 0.47      | < 4.30      | > 50      |
| G-151 | 5.74 ± 0.07                       | 1.81      | 5.18 ± 0.21 | 6.56      | 5.49 ± 0.28                       | 3.22      | < 4.70      | > 20      | < 4.30      | > 50      |
| G-152 | 7.13 ± 0.10                       | 0.07      | 6.16 ± 0.09 | 0.69      | 5.56 ± 0.17                       | 2.73      | 5.00 ± 0.06 | 9.95      | < 4.30      | > 50      |
| G-153 | 7.08 ± 0.14                       | 0.08      | 6.43 ± 0.26 | 0.37      | 5.92 ± 0.24                       | 1.19      | 5.47 ± 0.10 | 3.40      | < 4.30      | > 50      |
| G-154 | 7.20 ± 0.40                       | 0.06      | 6.86 ± 0.20 | 0.14      | 6.08 ± 0.27                       | 0.83      | 5.55 ± 0.08 | 2.84      | < 4.30      | > 50      |
| G-155 | 7.42 ± 0.31                       | 0.04      | 6.77 ± 0.17 | 0.17      | 6.18 ± 0.26                       | 0.66      | 5.87 ± 0.13 | 1.35      | 4.47 ± 0.06 | 34        |
| G-156 | 6.79 ± 0.21                       | 0.16      | 6.14 ± 0.07 | 0.73      | 5.47 ± 0.22                       | 3.40      | 5.15 ± 0.07 | 7.05      | < 4.30      | > 50      |
| G-159 | 6.75 ± 0.40                       | 0.18      | 5.81 ± 0.09 | 1.56      | 5.33 ± 0.25                       | 4.68      | 4.91 ± 0.05 | 12.30     | < 4.30      | > 50      |
| G-160 | 7.19 ± 0.51                       | 0.06      | 6.54 ± 0.07 | 0.29      | 5.59 ± 0.25                       | 2.56      | 5.33 ± 0.02 | 4.66      | < 4.30      | > 50      |



|       |             |      |             |       |             |       |             |       |             |      |
|-------|-------------|------|-------------|-------|-------------|-------|-------------|-------|-------------|------|
| G-161 | 7.12 ± 0.05 | 0.08 | 6.89 ± 0.15 | 0.13  | 5.92 ± 0.19 | 1.21  | 5.40 ± 0.11 | 3.96  | < 4.30      | > 50 |
| G-162 | 6.92 ± 0.01 | 0.12 | 5.84 ± 0.16 | 1.43  | 5.23 ± 0.20 | 5.86  | 4.87 ± 0.13 | 13.55 | < 4.30      | > 50 |
| G-163 | 6.64 ± 0.18 | 0.23 | 6.54 ± 0.07 | 0.29  | 5.54 ± 0.25 | 2.86  | 5.23 ± 0.08 | 5.96  | < 4.30      | > 50 |
| G-202 | 5.85 ± 0.10 | 1.40 | 5.77 ± 0.14 | 1.72  | 5.57 ± 0.19 | 2.68  | 4.75 ± 0.05 | 17.92 | < 4.30      | > 50 |
| G-203 | 5.86 ± 0.04 | 1.38 | 5.77 ± 0.06 | 1.70  | 5.56 ± 0.25 | 2.74  | 4.81 ± 0.06 | 15.67 | < 4.30      | > 50 |
| G-204 | 7.10 ± 0.13 | 0.08 | 6.41 ± 0.18 | 0.39  | 5.66 ± 0.21 | 2.17  | 5.34 ± 0.04 | 4.54  | < 4.30      | > 50 |
| G-205 | 6.30 ± 0.15 | 0.50 | 5.95 ± 0.11 | 1.12  | 5.44 ± 0.15 | 3.65  | 5.03 ± 0.06 | 9.38  | < 4.30      | > 50 |
| G-206 | 5.91 ± 0.08 | 1.22 | 6.03 ± 0.11 | 0.93  | 6.19 ± 0.18 | 0.65  | 5.12 ± 0.10 | 7.59  | < 4.30      | > 50 |
| G-207 | 6.34 ± 0.74 | 0.46 | 6.07 ± 0.10 | 0.86  | 5.63 ± 0.28 | 2.36  | 5.02 ± 0.03 | 9.62  | < 4.30      | > 50 |
| G-208 | 6.39 ± 0.08 | 0.41 | 5.62 ± 0.34 | 2.39  | 5.48 ± 0.22 | 3.34  | 4.77 ± 0.04 | 17.05 | < 4.30      | > 50 |
| G-209 | 5.61 ± 0.13 | 2.44 | 4.99 ± 0.18 | 10.15 | 5.36 ± 0.18 | 4.35  | 4.80 ± 0.06 | 15.85 | < 4.30      | > 50 |
| G-210 | 6.18 ± 0.30 | 0.67 | 5.99 ± 0.21 | 1.02  | 5.38 ± 0.19 | 4.14  | 4.74 ± 0.03 | 18.37 | < 4.30      | > 50 |
| G-211 | 5.88 ± 0.09 | 1.33 | 5.07 ± 0.26 | 8.58  | 5.25 ± 0.27 | 5.59  | < 4.70      | > 20  | < 4.30      | > 50 |
| G-212 | 6.38 ± 0.19 | 0.41 | 6.33 ± 0.22 | 0.47  | 5.48 ± 0.20 | 3.28  | 5.03 ± 0.07 | 9.30  | < 4.30      | > 50 |
| G-213 | 7.34 ± 0.32 | 0.05 | 6.65 ± 0.09 | 0.22  | 5.64 ± 0.21 | 2.30  | 5.18 ± 0.05 | 6.61  | < 4.30      | > 50 |
| G-215 | 7.12 ± 0.06 | 0.08 | 6.59 ± 0.15 | 0.26  | 6.11 ± 0.20 | 0.78  | 5.83 ± 0.06 | 1.47  | < 4.30      | > 50 |
| G-216 | 5.78 ± 0.00 | 1.66 | < 4.70      | > 20  | 4.93 ± 0.18 | 11.80 | < 4.70      | > 20  | < 4.30      | > 50 |
| G-217 | 5.73 ± 0.11 | 1.86 | 5.25 ± 0.15 | 5.69  | 5.13 ± 0.17 | 7.38  | 4.75 ± 0.03 | 17.99 | < 4.30      | > 50 |
| G-218 | 5.76 ± 0.17 | 1.74 | 5.44 ± 0.14 | 3.67  | 5.32 ± 0.16 | 4.74  | 4.83 ± 0.09 | 14.66 | < 4.30      | > 50 |
| G-219 | 7.15 ± 0.42 | 0.07 | 6.34 ± 0.07 | 0.46  | 5.92 ± 0.20 | 1.22  | 5.09 ± 0.07 | 8.13  | < 4.30      | > 50 |
| G-220 | 6.21 ± 0.20 | 0.62 | 5.23 ± 0.23 | 5.84  | 5.38 ± 0.35 | 4.19  | 4.72 ± 0.02 | 19.28 | < 4.30      | > 50 |
| G-221 | 6.04 ± 0.12 | 0.91 | 5.41 ± 0.06 | 3.87  | 5.27 ± 0.21 | 5.35  | 4.87 ± 0.04 | 13.37 | < 4.30      | > 50 |
| G-222 | 8.14 ± 0.13 | 0.01 | 6.36 ± 0.14 | 0.44  | 5.79 ± 0.31 | 1.62  | 5.59 ± 0.09 | 2.55  | 4.31 ± 0.02 | 49   |
| G-223 | 6.03 ± 0.15 | 0.93 | 5.71 ± 0.15 | 1.95  | 5.25 ± 0.18 | 5.57  | 4.95 ± 0.06 | 11.22 | < 4.30      | > 50 |
| G-224 | 7.62 ± 0.39 | 0.02 | 6.70 ± 0.31 | 0.20  | 6.02 ± 0.21 | 0.96  | 5.87 ± 0.05 | 1.36  | < 4.30      | > 50 |
| G-225 | 6.59 ± 0.16 | 0.26 | 5.58 ± 0.13 | 2.63  | 5.31 ± 0.24 | 4.87  | 4.83 ± 0.05 | 14.79 | < 4.30      | > 50 |
| G-226 | 7.16 ± 0.12 | 0.07 | 6.07 ± 0.09 | 0.86  | 5.42 ± 0.19 | 3.84  | 5.05 ± 0.09 | 8.95  | < 4.30      | > 50 |
| G-227 | 7.48 ± 0.17 | 0.03 | 6.37 ± 0.10 | 0.43  | 5.36 ± 0.22 | 4.39  | 5.25 ± 0.10 | 5.57  | < 4.30      | > 50 |
| G-228 | 7.95 ± 0.07 | 0.01 | 5.82 ± 0.14 | 1.50  | 5.05 ± 0.17 | 8.87  | 4.85 ± 0.06 | 14.04 | < 4.30      | > 50 |
| G-229 | 6.65 ± 0.12 | 0.22 | 5.98 ± 0.14 | 1.06  | 5.76 ± 0.22 | 1.75  | 5.10 ± 0.06 | 8.02  | < 4.30      | > 50 |
| G-230 | 7.16 ± 0.11 | 0.07 | 6.45 ± 0.05 | 0.35  | 5.86 ± 0.25 | 1.37  | 5.45 ± 0.13 | 3.55  | < 4.30      | > 50 |
| G-231 | 6.11 ± 0.19 | 0.77 | 6.02 ± 0.17 | 0.96  | 5.52 ± 0.20 | 3.04  | 5.00 ± 0.08 | 10.09 | < 4.30      | > 50 |
| G-232 | 6.44 ± 0.10 | 0.36 | 6.27 ± 0.17 | 0.53  | 5.73 ± 0.18 | 1.85  | 5.32 ± 0.11 | 4.82  | < 4.30      | > 50 |
| G-233 | 7.09 ± 0.15 | 0.08 | 6.71 ± 0.05 | 0.19  | 5.70 ± 0.23 | 1.98  | 5.39 ± 0.15 | 4.09  | < 4.30      | > 50 |
| G-234 | 7.13 ± 0.37 | 0.07 | 7.11 ± 0.06 | 0.08  | 6.03 ± 0.34 | 0.93  | 5.50 ± 0.04 | 3.13  | < 4.30      | > 50 |
| G-235 | 6.19 ± 0.11 | 0.65 | 5.70 ± 0.09 | 2.00  | 5.56 ± 0.23 | 2.73  | 4.82 ± 0.06 | 15.02 | < 4.30      | > 50 |
| G-236 | 6.78 ± 0.43 | 0.17 | 5.18 ± 0.13 | 6.68  | 5.10 ± 0.25 | 7.91  | < 4.70      | > 20  | < 4.30      | > 50 |
| G-237 | 6.09 ± 0.09 | 0.82 | 5.61 ± 0.13 | 2.44  | 5.31 ± 0.23 | 4.88  | 4.87 ± 0.08 | 13.65 | < 4.30      | > 50 |
| G-238 | 6.33 ± 0.11 | 0.47 | 5.05 ± 0.06 | 8.99  | 5.20 ± 0.27 | 6.38  | < 4.70      | > 20  | < 4.30      | > 50 |
| G-239 | 6.87 ± 0.52 | 0.14 | 6.37 ± 0.18 | 0.42  | 5.67 ± 0.34 | 2.15  | 5.18 ± 0.04 | 6.58  | < 4.30      | > 50 |
| G-240 | 6.39 ± 0.16 | 0.40 | 6.66 ± 0.15 | 0.22  | 5.76 ± 0.23 | 1.75  | 5.40 ± 0.04 | 3.96  | < 4.30      | > 50 |
| G-241 | 6.20 ± 0.10 | 0.63 | 5.92 ± 0.14 | 1.20  | 5.24 ± 0.17 | 5.78  | 4.74 ± 0.04 | 18.03 | < 4.30      | > 50 |
| G-242 | 6.93 ± 0.34 | 0.12 | 5.91 ± 0.11 | 1.22  | 5.11 ± 0.19 | 7.83  | 4.74 ± 0.03 | 18.20 | < 4.30      | > 50 |
| G-243 | 6.76 ± 0.09 | 0.17 | 5.72 ± 0.15 | 1.92  | 5.01 ± 0.16 | 9.73  | 4.74 ± 0.04 | 18.28 | < 4.30      | > 50 |
| G-244 | 6.68 ± 0.03 | 0.21 | 6.51 ± 0.18 | 0.31  | 5.56 ± 0.22 | 2.73  | 5.34 ± 0.11 | 4.57  | 4.35 ± 0.06 | 45   |
| G-245 | 7.22 ± 0.34 | 0.06 | 6.47 ± 0.13 | 0.34  | 5.73 ± 0.18 | 1.88  | 5.30 ± 0.16 | 5.03  | < 4.30      | > 50 |
| G-247 | 7.61 ± 0.09 | 0.02 | 5.99 ± 0.11 | 1.02  | 5.00 ± 0.13 | 10.09 | 4.84 ± 0.06 | 14.45 | < 4.30      | > 50 |
| G-301 | 7.78 ± 0.35 | 0.02 | 6.59 ± 0.21 | 0.26  | 5.66 ± 0.21 | 2.21  | 5.42 ± 0.15 | 3.77  | < 4.30      | > 50 |
| G-302 | 6.60 ± 0.41 | 0.25 | 6.18 ± 0.08 | 0.66  | 5.73 ± 0.21 | 1.86  | 4.95 ± 0.08 | 11.13 | < 4.30      | > 50 |
| G-303 | 7.01 ± 0.27 | 0.10 | 6.67 ± 0.23 | 0.21  | 6.05 ± 0.23 | 0.90  | 5.74 ± 0.08 | 1.84  | < 4.30      | > 50 |
| G-304 | 6.58 ± 0.45 | 0.26 | 5.32 ± 0.32 | 4.84  | 5.30 ± 0.26 | 5.07  | 4.72 ± 0.02 | 18.98 | < 4.30      | > 50 |
| G-305 | 6.79 ± 0.23 | 0.16 | 6.03 ± 0.10 | 0.94  | 5.63 ± 0.21 | 2.33  | 5.13 ± 0.09 | 7.44  | < 4.30      | > 50 |
| G-306 |             |      | 6.19 ± 0.15 | 0.65  | 5.51 ± 0.24 | 3.07  | 5.01 ± 0.06 | 9.85  |             |      |
| G-307 | 5.97 ± 0.32 | 1.06 | 5.08 ± 0.15 | 8.37  | 5.37 ± 0.24 | 4.24  | 4.74 ± 0.04 | 18.20 | < 4.30      | > 50 |

|       |             |      |             |      |             |       |             |       |             |      |
|-------|-------------|------|-------------|------|-------------|-------|-------------|-------|-------------|------|
| G-308 | 6.84 ± 0.32 | 0.15 | 5.77 ± 0.17 | 1.69 | 5.51 ± 0.28 | 3.09  | 5.03 ± 0.04 | 9.37  | < 4.30      | > 50 |
| G-309 | 6.17 ± 0.26 | 0.68 | 5.55 ± 0.12 | 2.80 | 5.35 ± 0.20 | 4.52  | 4.90 ± 0.02 | 12.47 | < 4.30      | > 50 |
| G-310 | 7.07 ± 0.40 | 0.09 | 5.97 ± 0.11 | 1.08 | 5.50 ± 0.27 | 3.14  | 4.96 ± 0.03 | 10.86 | < 4.30      | > 50 |
| G-311 | 5.85 ± 0.25 | 1.42 | 5.00 ± 0.17 | 9.94 | 5.09 ± 0.26 | 8.22  | < 4.70      | > 20  | < 4.30      | > 50 |
| G-312 | 6.61 ± 0.14 | 0.25 | 6.01 ± 0.06 | 0.98 | 5.39 ± 0.28 | 4.12  | 4.95 ± 0.01 | 11.16 | < 4.30      | > 50 |
| G-313 | 7.39 ± 0.30 | 0.04 | 6.22 ± 0.17 | 0.60 | 5.72 ± 0.25 | 1.89  | 5.28 ± 0.09 | 5.31  | < 4.30      | > 50 |
| G-314 | 6.41 ± 0.20 | 0.39 | 6.07 ± 0.09 | 0.86 | 5.31 ± 0.25 | 4.90  | 4.72 ± 0.02 | 19.23 | < 4.30      | > 50 |
| G-315 | 6.92 ± 0.17 | 0.12 | 7.46 ± 0.13 | 0.03 | 5.86 ± 0.28 | 1.40  | 5.53 ± 0.07 | 2.92  | < 4.30      | > 50 |
| G-316 | 7.15 ± 0.27 | 0.07 | 6.56 ± 0.12 | 0.28 | 5.48 ± 0.25 | 3.29  | 5.10 ± 0.08 | 8.02  | < 4.30      | > 50 |
| G-317 | 6.00 ± 0.16 | 1.01 | 5.57 ± 0.14 | 2.69 | 5.28 ± 0.18 | 5.22  | 4.86 ± 0.07 | 13.74 | < 4.30      | > 50 |
| G-318 | 5.96 ± 0.16 | 1.10 | 5.06 ± 0.18 | 8.64 | 4.98 ± 0.18 | 10.59 | < 4.70      | > 20  | < 4.30      | > 50 |
| G-319 | 6.48 ± 0.28 | 0.33 | 5.35 ± 0.16 | 4.47 | 5.22 ± 0.21 | 6.03  | < 4.70      | > 20  | < 4.30      | > 50 |
| G-320 | 7.21 ± 0.06 | 0.06 | 6.89 ± 0.02 | 0.13 | 5.60 ± 0.22 | 2.50  | 5.58 ± 0.07 | 2.61  | < 4.30      | > 50 |
| G-321 | 7.00 ± 0.11 | 0.10 | 6.90 ± 0.21 | 0.13 | 5.49 ± 0.16 | 3.24  | 5.18 ± 0.06 | 6.67  | < 4.30      | > 50 |
| G-323 | 7.40 ± 0.27 | 0.04 | 6.29 ± 0.11 | 0.51 | 5.59 ± 0.19 | 2.56  | 5.02 ± 0.07 | 9.46  | < 4.30      | > 50 |
| G-324 | 7.29 ± 0.51 | 0.05 | 6.57 ± 0.14 | 0.27 | 5.48 ± 0.23 | 3.35  | 5.06 ± 0.04 | 8.75  | < 4.30      | > 50 |
| G-325 | 6.93 ± 0.34 | 0.12 | 7.29 ± 0.11 | 0.05 | 5.98 ± 0.27 | 1.05  | 5.63 ± 0.06 | 2.36  | < 4.30      | > 50 |
| G-326 | 6.87 ± 0.40 | 0.13 | 6.01 ± 0.20 | 0.97 | 5.20 ± 0.17 | 6.38  | 4.88 ± 0.03 | 13.24 | 5.14 ± 0.01 | 7    |
| G-327 | 5.70 ± 0.11 | 2.01 | 5.21 ± 0.11 | 6.13 | 5.12 ± 0.19 | 7.55  | < 4.70      | > 20  | < 4.30      | > 50 |
| G-329 | 6.09 ± 0.09 | 0.82 | 5.56 ± 0.07 | 2.74 | 5.33 ± 0.29 | 4.72  | 4.95 ± 0.03 | 11.17 | 5.14 ± 0.04 | 7    |
| G-330 | 5.98 ± 0.14 | 1.04 | 5.18 ± 0.14 | 6.61 | 5.29 ± 0.21 | 5.13  | 4.84 ± 0.05 | 14.45 | < 4.30      | > 50 |
| G-331 | 6.32 ± 0.33 | 0.48 | 5.71 ± 0.13 | 1.96 | 5.28 ± 0.18 | 5.25  | 4.95 ± 0.09 | 11.32 | < 4.30      | > 50 |
| G-332 | 6.25 ± 0.13 | 0.56 | 6.75 ± 0.19 | 0.18 | 5.68 ± 0.21 | 2.09  | 5.26 ± 0.11 | 5.47  | < 4.30      | > 50 |
| G-333 | 6.24 ± 0.60 | 0.57 | 6.17 ± 0.15 | 0.67 | 5.34 ± 0.23 | 4.60  | 5.06 ± 0.06 | 8.75  | 4.32 ± 0.02 | 48   |
| G-334 | 5.97 ± 0.13 | 1.07 | 5.20 ± 0.17 | 6.31 | 5.27 ± 0.25 | 5.32  | 4.92 ± 0.04 | 12.13 | < 4.30      | > 50 |
| G-335 | 6.89 ± 0.08 | 0.13 | 6.93 ± 0.05 | 0.12 | 5.86 ± 0.23 | 1.40  | 5.56 ± 0.06 | 2.75  | < 4.30      | > 50 |
| G-336 | 6.35 ± 0.19 | 0.45 | 6.17 ± 0.05 | 0.67 | 5.58 ± 0.23 | 2.62  | 5.11 ± 0.06 | 7.69  | < 4.30      | > 50 |
| G-337 | 5.88 ± 0.03 | 1.33 | 5.94 ± 0.13 | 1.15 | 5.50 ± 0.14 | 3.16  | 4.74 ± 0.04 | 18.03 | < 4.30      | > 50 |
| G-338 | 7.05 ± 0.14 | 0.09 | 6.00 ± 0.35 | 0.99 | 5.36 ± 0.25 | 4.42  | 5.03 ± 0.06 | 9.42  | < 4.30      | > 50 |
| G-340 | 6.18 ± 0.05 | 0.66 | 6.08 ± 0.21 | 0.83 | 5.35 ± 0.19 | 4.49  | 4.93 ± 0.05 | 11.80 | < 4.30      | > 50 |
| G-342 | 5.73 ± 0.13 | 1.88 | 5.80 ± 0.08 | 1.60 | 5.72 ± 0.20 | 1.91  | 4.82 ± 0.05 | 15.07 | < 4.30      | > 50 |
| G-343 | 6.76 ± 0.48 | 0.17 | 5.25 ± 0.15 | 5.66 | 5.55 ± 0.19 | 2.85  | 4.75 ± 0.05 | 17.95 | 4.61 ± 0.06 | 25   |
| G-344 | 5.52 ± 0.14 | 3.02 | 5.32 ± 0.18 | 4.82 | 5.50 ± 0.28 | 3.19  | 4.81 ± 0.03 | 15.56 | < 4.30      | > 50 |
| G-345 | 6.48 ± 0.15 | 0.33 | 5.28 ± 0.15 | 5.28 | 5.21 ± 0.22 | 6.22  | 4.73 ± 0.03 | 18.62 | < 4.30      | > 50 |
| G-346 | 7.31 ± 0.16 | 0.05 | 6.52 ± 0.12 | 0.30 | 5.42 ± 0.26 | 3.78  | 5.24 ± 0.13 | 5.75  | < 4.30      | > 50 |
| G-347 | 7.54 ± 0.17 | 0.03 | 6.10 ± 0.08 | 0.80 | 5.23 ± 0.19 | 5.89  | 4.88 ± 0.04 | 13.18 | < 4.30      | > 50 |
| G-352 | 6.95 ± 0.30 | 0.11 | 5.86 ± 0.23 | 1.38 | 5.16 ± 0.26 | 6.96  | 4.72 ± 0.02 | 19.13 | < 4.30      | > 50 |
| G-353 | 6.05 ± 0.24 | 0.89 | 5.92 ± 0.25 | 1.20 | 5.64 ± 0.26 | 2.29  | 4.94 ± 0.01 | 11.38 | < 4.30      | > 50 |
| G-354 | 7.08 ± 0.19 | 0.08 | 6.24 ± 0.14 | 0.58 | 5.37 ± 0.25 | 4.24  | 4.96 ± 0.04 | 10.91 | 4.34 ± 0.04 | 46   |

The activities of the indicated nitrothiazoles were assayed against two metronidazole-sensitive ( $Mz^S$ ) *G. lamblia* strains (713 and 106) and two metronidazole-resistant ( $Mz^R$ ) *G. lamblia* strains (713M3 and WB-M2) in a 48 h growth and survival assay with ATP as a read-out. Triazole names refer to the azide core with the first letter (G, see Fig. 1) and the alkynes with the number (101-354); Ntz, Nitazoxanide. Data are mean ± SE of the pEC50 values obtained in at least three independent experiments; EC50 values (in  $\mu$ M) were calculated from the mean pEC50. Cytotoxicity of the nitrothiazoles was tested against human HeLa epithelial cells in a 48 h growth and survival assay, using AlamarBlue dye reduction as a read-out. Data are mean ± SE of the pCC50 values obtained in at least three independent experiments; CC50 values (in  $\mu$ M) were calculated from the mean pCC50. Compounds with no detectable cytotoxicity at the highest tested concentration (50  $\mu$ M) are indicated with a pCC50 value of <4.30.

**Table S3. Antigiardial activity and cytotoxicity of new nitrofurans**

| Name  | Mz <sup>S</sup> <i>G. lamblia</i> |           |      |              |           |      | Mz <sup>R</sup> <i>G. lamblia</i> |           |       |             |           |       | HeLa        |           |
|-------|-----------------------------------|-----------|------|--------------|-----------|------|-----------------------------------|-----------|-------|-------------|-----------|-------|-------------|-----------|
|       | 713                               |           |      | 106          |           |      | 713M3                             |           |       | WB-M2       |           |       | pCC50       | CC50 (μM) |
|       | pEC50                             | EC50 (μM) | EC50 | pEC50        | EC50 (μM) | EC50 | pEC50                             | EC50 (μM) | EC50  | pEC50       | EC50 (μM) | EC50  |             |           |
| Fzd   | 6.39 ± 0.10                       | 0.40      | 0.40 | 6.15 ± 0.10  | 0.71      | 0.71 | 5.52 ± 0.15                       | 3.02      | 3.02  | 5.48 ± 0.30 | 3.32      | 3.32  |             |           |
| H-101 | 6.04 ± 0.39                       | 0.92      | 0.92 | 6.45 ± 0.36  | 0.09      | 0.09 | 6.91 ± 0.08                       | 0.12      | 0.12  | 5.80 ± 0.12 | 1.58      | 1.58  | 4.48 ± 0.07 | 33        |
| H-102 | 5.66 ± 0.14                       | 2.18      | 2.18 | 5.50 ± 3.20  | 0.22      | 0.22 | 5.52 ± 0.29                       | 3.02      | 3.02  | 4.75 ± 0.05 | 17.92     | 17.92 | 4.45 ± 0.08 | 35        |
| H-103 | 5.80 ± 0.23                       | 1.58      | 1.58 | 6.27 ± 0.54  | 0.20      | 0.20 | 6.17 ± 0.28                       | 0.68      | 0.68  | 5.50 ± 0.16 | 3.19      | 3.19  | 5.00 ± 0.05 | 10        |
| H-104 | 5.42 ± 0.16                       | 3.77      | 3.77 | 5.70 ± 2.00  | 0.20      | 0.20 | 5.49 ± 0.33                       | 3.21      | 3.21  | 4.85 ± 0.06 | 14.18     | 14.18 | 4.44 ± 0.11 | 36        |
| H-105 | 5.54 ± 0.17                       | 2.86      | 2.86 | 5.53 ± 2.99  | 0.15      | 0.15 | 5.45 ± 0.27                       | 3.58      | 3.58  | 4.87 ± 0.03 | 13.54     | 13.54 | 4.42 ± 0.07 | 38        |
| H-106 | 5.62 ± 0.11                       | 2.42      | 2.42 | 5.98 ± 1.05  | 0.23      | 0.23 | 5.66 ± 0.41                       | 2.17      | 2.17  | 4.96 ± 0.08 | 11.01     | 11.01 | < 4.30      | > 50      |
| H-107 | 5.63 ± 0.13                       | 2.34      | 2.34 | 5.90 ± 1.27  | 0.24      | 0.24 | 6.46 ± 0.17                       | 0.35      | 0.35  | 5.05 ± 0.08 | 8.95      | 8.95  | 4.67 ± 0.04 | 21        |
| H-108 | 5.66 ± 0.14                       | 2.21      | 2.21 | 5.84 ± 1.45  | 0.27      | 0.27 | 5.84 ± 0.24                       | 1.44      | 1.44  | 5.02 ± 0.08 | 9.55      | 9.55  | < 4.30      | > 50      |
| H-109 | 5.56 ± 0.12                       | 2.76      | 2.76 | 6.01 ± 0.98  | 0.20      | 0.20 | 5.61 ± 0.31                       | 2.44      | 2.44  | 5.05 ± 0.11 | 8.98      | 8.98  | 4.38 ± 0.06 | 42        |
| H-110 | 5.61 ± 0.13                       | 2.45      | 2.45 | 5.63 ± 2.37  | 0.11      | 0.11 | 5.46 ± 0.20                       | 3.47      | 3.47  | 4.85 ± 0.04 | 14.07     | 14.07 | 4.71 ± 0.06 | 20        |
| H-111 | 5.77 ± 0.12                       | 1.71      | 1.71 | 5.68 ± 2.08  | 0.17      | 0.17 | 6.17 ± 0.25                       | 0.68      | 0.68  | 5.14 ± 0.15 | 7.22      | 7.22  | 4.73 ± 0.11 | 19        |
| H-112 | 5.73 ± 0.09                       | 1.88      | 1.88 | 6.02 ± 0.97  | 0.28      | 0.28 | 5.99 ± 0.30                       | 1.04      | 1.04  | 5.15 ± 0.10 | 7.05      | 7.05  | 4.43 ± 0.07 | 38        |
| H-113 | 5.49 ± 0.14                       | 3.21      | 3.21 | 6.09 ± 0.82  | 0.12      | 0.12 | 5.88 ± 0.26                       | 1.32      | 1.32  | 5.03 ± 0.07 | 9.26      | 9.26  | 4.78 ± 0.04 | 17        |
| H-115 | 5.29 ± 0.11                       | 5.19      | 5.19 | 5.50 ± 3.14  | 0.26      | 0.26 | 5.99 ± 0.30                       | 1.04      | 1.04  | 5.01 ± 0.04 | 9.81      | 9.81  | 4.95 ± 0.03 | 11        |
| H-116 | 6.68 ± 0.14                       | 0.21      | 0.21 | 6.65 ± 0.23  | 0.08      | 0.08 | 7.64 ± 0.26                       | 0.02      | 0.02  | 6.06 ± 0.17 | 0.87      | 0.87  | 4.34 ± 0.11 | 45        |
| H-117 | 5.89 ± 0.44                       | 1.28      | 1.28 | 5.54 ± 2.88  | 0.29      | 0.29 | 4.88 ± 0.18                       | 13.08     | 13.08 | 4.73 ± 0.03 | 18.69     | 18.69 | 4.62 ± 0.15 | 24        |
| H-118 | 5.59 ± 0.23                       | 2.56      | 2.56 | 5.52 ± 3.00  | 0.24      | 0.24 | 5.15 ± 0.28                       | 7.12      | 7.12  | 4.75 ± 0.05 | 17.92     | 17.92 | 4.95 ± 0.07 | 11        |
| H-119 | 5.43 ± 0.13                       | 3.73      | 3.73 | 5.42 ± 3.80  | 0.18      | 0.18 | 5.06 ± 0.08                       | 8.78      | 8.78  | 4.86 ± 0.06 | 13.80     | 13.80 | < 4.30      | > 50      |
| H-120 | 6.73 ± 0.32                       | 0.19      | 0.19 | 6.38 ± 0.42  | 0.14      | 0.14 | 6.58 ± 0.21                       | 0.26      | 0.26  | 5.59 ± 0.13 | 2.60      | 2.60  | 4.38 ± 0.12 | 41        |
| H-121 | 5.86 ± 0.22                       | 1.40      | 1.40 | 6.01 ± 0.98  | 0.12      | 0.12 | 5.91 ± 0.24                       | 1.22      | 1.22  | 5.19 ± 0.09 | 6.46      | 6.46  | 4.36 ± 0.11 | 43        |
| H-122 | 6.66 ± 0.25                       | 0.22      | 0.22 | 6.51 ± 0.31  | 0.16      | 0.16 | 6.27 ± 0.27                       | 0.54      | 0.54  | 5.64 ± 0.06 | 2.30      | 2.30  | < 4.30      | > 50      |
| H-123 | 6.22 ± 0.26                       | 0.61      | 0.61 | 6.31 ± 0.49  | 0.18      | 0.18 | 5.87 ± 0.22                       | 1.35      | 1.35  | 5.44 ± 0.10 | 3.66      | 3.66  | 4.51 ± 0.08 | 31        |
| H-124 | 5.59 ± 0.19                       | 2.60      | 2.60 | 5.88 ± 1.31  | 0.14      | 0.14 | 5.53 ± 0.16                       | 2.95      | 2.95  | 5.07 ± 0.08 | 8.61      | 8.61  | 4.40 ± 0.05 | 40        |
| H-125 | 5.64 ± 0.11                       | 2.29      | 2.29 | 5.61 ± 2.45  | 0.17      | 0.17 | 5.16 ± 0.23                       | 6.96      | 6.96  | 4.80 ± 0.05 | 15.92     | 15.92 | < 4.30      | > 50      |
| H-126 | 6.20 ± 0.29                       | 0.63      | 0.63 | 4.70 ± 19.95 | 0.00      | 0.00 | < 4.70                            | > 20      | > 20  | < 4.70      | > 20      | > 20  | 4.33 ± 0.01 | 47        |
| H-127 | 5.55 ± 0.14                       | 2.84      | 2.84 | 5.49 ± 3.24  | 0.15      | 0.15 | 5.28 ± 0.19                       | 5.22      | 5.22  | 4.97 ± 0.08 | 10.80     | 10.80 | 4.87 ± 0.10 | 13        |
| H-128 | 5.72 ± 0.15                       | 1.91      | 1.91 | 5.36 ± 4.42  | 0.17      | 0.17 | 5.39 ± 0.23                       | 4.05      | 4.05  | 4.82 ± 0.04 | 15.14     | 15.14 | < 4.30      | > 50      |
| H-129 | 5.52 ± 0.09                       | 3.05      | 3.05 | 5.66 ± 2.21  | 0.18      | 0.18 | 5.81 ± 0.32                       | 1.56      | 1.56  | 4.99 ± 0.05 | 10.27     | 10.27 | 4.54 ± 0.09 | 29        |
| H-130 | 5.74 ± 0.26                       | 1.83      | 1.83 | 5.43 ± 3.72  | 0.20      | 0.20 | 5.17 ± 0.30                       | 6.72      | 6.72  | 4.77 ± 0.04 | 17.18     | 17.18 | 5.00 ± 0.03 | 10        |
| H-131 | 5.72 ± 0.10                       | 1.91      | 1.91 | 5.39 ± 4.10  | 0.17      | 0.17 | 5.19 ± 0.30                       | 6.53      | 6.53  | 4.93 ± 0.06 | 11.84     | 11.84 | 4.36 ± 0.09 | 43        |
| H-132 | 5.38 ± 0.08                       | 4.18      | 4.18 | 5.53 ± 2.99  | 0.20      | 0.20 | 5.36 ± 0.25                       | 4.42      | 4.42  | 4.89 ± 0.05 | 12.93     | 12.93 | 4.48 ± 0.10 | 33        |
| H-133 | 5.44 ± 0.13                       | 3.60      | 3.60 | 5.61 ± 2.45  | 0.14      | 0.14 | 5.29 ± 0.28                       | 5.13      | 5.13  | 4.85 ± 0.04 | 14.06     | 14.06 | 4.38 ± 0.10 | 42        |
| H-134 | 6.32 ± 0.17                       | 0.48      | 0.48 | 6.35 ± 0.44  | 0.24      | 0.24 | 6.37 ± 0.23                       | 0.43      | 0.43  | 5.49 ± 0.06 | 3.27      | 3.27  | 4.58 ± 0.14 | 26        |
| H-135 | 6.01 ± 0.25                       | 0.98      | 0.98 | 5.74 ± 1.82  | 0.14      | 0.14 | 6.31 ± 0.11                       | 0.49      | 0.49  | 5.15 ± 0.09 | 7.08      | 7.08  | 4.94 ± 0.09 | 12        |
| H-136 | 6.01 ± 0.24                       | 0.98      | 0.98 | 6.12 ± 0.75  | 0.17      | 0.17 | 5.60 ± 0.19                       | 2.51      | 2.51  | 5.21 ± 0.09 | 6.14      | 6.14  | < 4.30      | > 50      |
| H-137 | 6.19 ± 0.20                       | 0.64      | 0.64 | 5.96 ± 1.09  | 0.25      | 0.25 | 5.55 ± 0.20                       | 2.83      | 2.83  | 4.89 ± 0.07 | 12.98     | 12.98 | 4.67 ± 0.16 | 21        |
| H-138 | 6.49 ± 0.06                       | 0.33      | 0.33 | 6.78 ± 0.16  | 0.05      | 0.05 | 6.11 ± 0.21                       | 0.78      | 0.78  | 5.27 ± 0.12 | 5.41      | 5.41  | 4.42 ± 0.05 | 38        |
| H-139 | 6.15 ± 0.14                       | 0.71      | 0.71 | 6.40 ± 0.40  | 0.25      | 0.25 | 6.17 ± 0.22                       | 0.67      | 0.67  | 5.86 ± 0.21 | 1.38      | 1.38  | 4.70 ± 0.11 | 20        |
| H-140 | 5.72 ± 0.27                       | 1.92      | 1.92 | 5.87 ± 1.36  | 0.23      | 0.23 | 5.42 ± 0.28                       | 3.82      | 3.82  | 5.00 ± 0.15 | 10.00     | 10.00 | 4.74 ± 0.04 | 18        |
| H-141 | 6.39 ± 0.10                       | 0.41      | 0.41 | 6.03 ± 0.94  | 0.21      | 0.21 | 6.13 ± 0.34                       | 0.75      | 0.75  | 5.20 ± 0.08 | 6.31      | 6.31  | 4.37 ± 0.07 | 43        |
| H-142 | 6.20 ± 0.21                       | 0.64      | 0.64 | 6.04 ± 0.91  | 0.01      | 0.01 | 6.38 ± 0.29                       | 0.41      | 0.41  | 5.64 ± 0.12 | 2.28      | 2.28  | < 4.30      | > 50      |
| H-143 | 6.29 ± 0.23                       | 0.51      | 0.51 | 6.37 ± 0.43  | 0.11      | 0.11 | 6.02 ± 0.22                       | 0.95      | 0.95  | 5.68 ± 0.08 | 2.11      | 2.11  | 4.33 ± 0.08 | 47        |
| H-144 | 6.43 ± 0.29                       | 0.37      | 0.37 | 6.51 ± 0.31  | 0.10      | 0.10 | 6.53 ± 0.21                       | 0.30      | 0.30  | 5.58 ± 0.06 | 2.63      | 2.63  | < 4.30      | > 50      |
| H-145 | 6.12 ± 0.16                       | 0.75      | 0.75 | 5.95 ± 1.13  | 0.19      | 0.19 | 5.91 ± 0.28                       | 1.24      | 1.24  | 5.06 ± 0.09 | 8.81      | 8.81  | 4.96 ± 0.07 | 11        |
| H-146 | 6.13 ± 0.10                       | 0.75      | 0.75 | 6.57 ± 0.27  | 0.06      | 0.06 | 6.48 ± 0.29                       | 0.33      | 0.33  | 5.59 ± 0.12 | 2.59      | 2.59  | 4.77 ± 0.05 | 17        |
| H-147 | 6.19 ± 0.15                       | 0.65      | 0.65 | 6.04 ± 0.91  | 0.12      | 0.12 | 5.34 ± 0.15                       | 4.57      | 4.57  | 4.98 ± 0.06 | 10.47     | 10.47 | 4.72 ± 0.02 | 19        |
| H-148 | 6.22 ± 0.23                       | 0.61      | 0.61 | 6.29 ± 0.52  | 0.25      | 0.25 | 6.12 ± 0.29                       | 0.76      | 0.76  | 5.09 ± 0.09 | 8.16      | 8.16  | < 4.30      | > 50      |
| H-149 | 5.86 ± 0.19                       | 1.38      | 1.38 | 6.11 ± 0.78  | 0.23      | 0.23 | 5.26 ± 0.24                       | 5.50      | 5.50  | 5.00 ± 0.09 | 9.92      | 9.92  | 4.71 ± 0.07 | 19        |
| H-150 | 6.02 ± 0.15                       | 0.97      | 0.97 | 5.88 ± 1.31  | 0.14      | 0.14 | 5.67 ± 0.27                       | 2.16      | 2.16  | 5.15 ± 0.08 | 7.16      | 7.16  | 4.87 ± 0.21 | 13        |
| H-151 | 6.70 ± 0.32                       | 0.20      | 0.20 | 6.55 ± 0.28  | 0.29      | 0.29 | 6.19 ± 0.29                       | 0.65      | 0.65  | 5.06 ± 0.09 | 8.68      | 8.68  | 4.59 ± 0.15 | 25        |
| H-152 | 5.46 ± 0.14                       | 3.47      | 3.47 | 5.77 ± 1.69  | 0.06      | 0.06 | 5.70 ± 0.36                       | 2.02      | 2.02  | 5.04 ± 0.06 | 9.16      | 9.16  | 4.39 ± 0.10 | 41        |
| H-153 | 5.67 ± 0.23                       | 2.16      | 2.16 | 5.58 ± 2.66  | 0.22      | 0.22 | 5.41 ± 0.25                       | 3.87      | 3.87  | 4.82 ± 0.05 | 15.08     | 15.08 | 5.02 ± 0.09 | 10        |
| H-154 | 5.82 ± 0.16                       | 1.50      | 1.50 | 5.91 ± 1.23  | 0.22      | 0.22 | 5.56 ± 0.35                       | 2.74      | 2.74  | 5.04 ± 0.09 | 9.09      | 9.09  | 5.26 ± 0.04 | 5         |
| H-155 | 5.72 ± 0.23                       | 1.93      | 1.93 | 5.91 ± 1.24  | 0.18      | 0.18 | 5.57 ± 0.32                       | 2.72      | 2.72  | 5.01 ± 0.06 | 9.70      | 9.70  | 4.83 ± 0.07 | 15        |

|       |             |      |             |      |             |       |             |       |             |      |
|-------|-------------|------|-------------|------|-------------|-------|-------------|-------|-------------|------|
| H-156 | 6.54 ± 0.23 | 0.29 | 6.12 ± 0.76 | 0.09 | 6.47 ± 0.30 | 0.34  | 5.31 ± 0.10 | 4.94  | < 4.30      | > 50 |
| H-159 | 6.76 ± 0.29 | 0.17 | 6.67 ± 0.21 | 0.16 | 6.43 ± 0.28 | 0.37  | 5.84 ± 0.09 | 1.46  | < 4.30      | > 50 |
| H-160 | 6.28 ± 0.23 | 0.52 | 6.58 ± 0.26 | 0.10 | 6.92 ± 0.25 | 0.12  | 5.81 ± 0.11 | 1.54  | < 4.30      | > 50 |
| H-161 | 6.40 ± 0.11 | 0.40 | 6.53 ± 0.30 | 0.17 | 6.51 ± 0.24 | 0.31  | 5.61 ± 0.08 | 2.46  | 4.36 ± 0.12 | 44   |
| H-162 | 5.90 ± 0.30 | 1.25 | 5.72 ± 1.91 | 0.21 | 5.68 ± 0.18 | 2.09  | 5.10 ± 0.10 | 8.00  | 4.36 ± 0.05 | 44   |
| H-163 | 7.11 ± 0.41 | 0.08 | 6.33 ± 0.47 | 0.17 | 6.55 ± 0.25 | 0.28  | 5.15 ± 0.11 | 7.03  | 4.47 ± 0.13 | 34   |
| H-201 | 5.22 ± 0.14 | 6.10 | 5.47 ± 3.41 | 0.22 | 4.94 ± 0.24 | 11.48 | 4.72 ± 0.02 | 18.98 | 4.40 ± 0.05 | 40   |
| H-202 | 5.64 ± 0.21 | 2.28 | 5.88 ± 1.33 | 0.23 | 5.69 ± 0.33 | 2.03  | 4.90 ± 0.04 | 12.54 | 4.57 ± 0.09 | 27   |
| H-203 | 5.77 ± 0.21 | 1.70 | 6.07 ± 0.85 | 0.17 | 5.76 ± 0.19 | 1.73  | 5.31 ± 0.07 | 4.86  | 4.72 ± 0.11 | 19   |
| H-204 | 5.58 ± 0.13 | 2.66 | 6.12 ± 0.76 | 0.22 | 6.02 ± 0.45 | 0.96  | 5.14 ± 0.08 | 7.33  | 5.09 ± 0.06 | 8    |
| H-205 | 5.74 ± 0.15 | 1.82 | 5.87 ± 1.35 | 0.25 | 5.86 ± 0.34 | 1.38  | 5.06 ± 0.10 | 8.78  | 4.46 ± 0.04 | 35   |
| H-206 | 5.93 ± 0.13 | 1.17 | 6.19 ± 0.65 | 0.21 | 6.17 ± 0.29 | 0.68  | 5.22 ± 0.11 | 6.03  | 4.68 ± 0.11 | 21   |
| H-207 | 5.79 ± 0.20 | 1.62 | 6.25 ± 0.56 | 0.20 | 6.21 ± 0.26 | 0.62  | 5.37 ± 0.07 | 4.23  | 4.74 ± 0.11 | 18   |
| H-208 | 6.03 ± 0.31 | 0.93 | 6.01 ± 0.99 | 0.18 | 5.23 ± 0.30 | 5.89  | 4.86 ± 0.04 | 13.96 | 4.85 ± 0.14 | 14   |
| H-209 | 5.89 ± 0.31 | 1.29 | 5.70 ± 2.01 | 0.17 | 6.05 ± 0.30 | 0.89  | 5.36 ± 0.11 | 4.40  | 4.69 ± 0.16 | 21   |
| H-210 | 6.99 ± 0.21 | 0.10 | 6.10 ± 0.80 | 0.22 | 6.10 ± 0.25 | 0.79  | 5.02 ± 0.06 | 9.55  | 4.58 ± 0.06 | 26   |
| H-211 | 6.17 ± 0.32 | 0.67 | 6.02 ± 0.95 | 0.18 | 6.33 ± 0.16 | 0.47  | 5.29 ± 0.12 | 5.17  | 4.36 ± 0.06 | 44   |
| H-212 | 5.64 ± 0.16 | 2.29 | 5.51 ± 3.13 | 0.24 | 5.33 ± 0.29 | 4.70  | 4.98 ± 0.07 | 10.47 | < 4.30      | > 50 |
| H-213 | 6.87 ± 0.29 | 0.13 | 6.78 ± 0.17 | 0.14 | 6.30 ± 0.33 | 0.51  | 5.71 ± 0.05 | 1.96  | < 4.30      | > 50 |
| H-214 | 5.60 ± 0.22 | 2.51 | 5.67 ± 2.16 | 0.34 | 5.39 ± 0.32 | 4.07  | 4.73 ± 0.03 | 18.55 | 4.56 ± 0.16 | 27   |
| H-215 | 5.61 ± 0.18 | 2.44 | 5.91 ± 1.24 | 0.18 | 5.63 ± 0.31 | 2.33  | 5.11 ± 0.13 | 7.76  | 4.64 ± 0.02 | 23   |
| H-216 | 5.82 ± 0.15 | 1.51 | 5.90 ± 1.27 | 0.23 | 5.69 ± 0.25 | 2.05  | 5.18 ± 0.21 | 6.68  | 4.50 ± 0.10 | 31   |
| H-217 | 5.35 ± 0.13 | 4.45 | 5.38 ± 4.14 | 0.21 | 5.37 ± 0.31 | 4.27  | 4.89 ± 0.10 | 12.88 | 4.50 ± 0.06 | 32   |
| H-218 | 5.59 ± 0.21 | 2.58 | 5.73 ± 1.85 | 0.15 | 5.28 ± 0.25 | 5.25  | 5.01 ± 0.12 | 9.70  | 4.55 ± 0.07 | 28   |
| H-219 | 6.34 ± 0.20 | 0.46 | 6.12 ± 0.76 | 0.07 | 5.86 ± 0.15 | 1.40  | 5.37 ± 0.09 | 4.30  | 4.41 ± 0.11 | 39   |
| H-220 | 7.49 ± 0.51 | 0.03 | 6.46 ± 0.35 | 0.14 | 6.39 ± 0.18 | 0.41  | 5.46 ± 0.14 | 3.48  | 5.39 ± 0.06 | 4    |
| H-221 | 6.53 ± 0.12 | 0.30 | 6.99 ± 0.10 | 0.17 | 6.10 ± 0.18 | 0.80  | 5.60 ± 0.11 | 2.50  | 4.38 ± 0.12 | 42   |
| H-222 | 6.56 ± 0.19 | 0.28 | 6.61 ± 0.25 | 0.07 | 6.72 ± 0.13 | 0.19  | 5.61 ± 0.09 | 2.44  | 4.35 ± 0.09 | 45   |
| H-223 | 5.52 ± 0.19 | 3.01 | 5.46 ± 3.47 | 0.21 | 5.10 ± 0.26 | 7.94  | 4.76 ± 0.04 | 17.38 | 4.79 ± 0.01 | 16   |
| H-224 | 6.30 ± 0.29 | 0.50 | 6.41 ± 0.39 | 0.15 | 6.74 ± 0.20 | 0.18  | 5.56 ± 0.10 | 2.73  | < 4.30      | > 50 |
| H-225 | 6.62 ± 0.19 | 0.24 | 6.39 ± 0.41 | 0.12 | 6.14 ± 0.24 | 0.73  | 5.28 ± 0.10 | 5.31  | 4.31 ± 0.09 | 49   |
| H-226 | 6.61 ± 0.09 | 0.24 | 6.66 ± 0.22 | 0.22 | 5.88 ± 0.10 | 1.33  | 5.51 ± 0.10 | 3.07  | 4.46 ± 0.03 | 35   |
| H-227 | 6.19 ± 0.20 | 0.64 | 6.02 ± 0.95 | 0.15 | 5.61 ± 0.37 | 2.44  | 4.98 ± 0.04 | 10.39 | 4.49 ± 0.09 | 32   |
| H-228 | 6.31 ± 0.03 | 0.49 | 7.01 ± 0.10 | 0.23 | 7.12 ± 0.21 | 0.08  | 6.02 ± 0.27 | 0.95  | 4.40 ± 0.05 | 40   |
| H-229 | 6.79 ± 0.00 | 0.16 | 6.87 ± 0.14 | 0.26 | 6.10 ± 0.24 | 0.80  | 5.72 ± 0.09 | 1.89  | < 4.30      | > 50 |
| H-230 | 6.80 ± 0.06 | 0.16 | 7.27 ± 0.05 | 0.10 | 7.28 ± 0.30 | 0.05  | 6.17 ± 0.12 | 0.68  | < 4.30      | > 50 |
| H-231 | 6.35 ± 0.23 | 0.45 | 6.54 ± 0.29 | 0.18 | 6.76 ± 0.24 | 0.17  | 5.78 ± 0.09 | 1.67  | < 4.30      | > 50 |
| H-232 | 5.90 ± 0.32 | 1.26 | 6.17 ± 0.68 | 0.21 | 5.94 ± 0.41 | 1.14  | 5.36 ± 0.12 | 4.38  | 4.57 ± 0.27 | 27   |
| H-233 | 6.82 ± 0.17 | 0.15 | 7.36 ± 0.04 | 0.07 | 6.84 ± 0.33 | 0.14  | 6.20 ± 0.11 | 0.63  | 4.37 ± 0.10 | 43   |
| H-234 | 6.40 ± 0.33 | 0.40 | 6.76 ± 0.17 | 0.12 | 6.95 ± 0.28 | 0.11  | 5.98 ± 0.06 | 1.05  | < 4.30      | > 50 |
| H-235 | 5.75 ± 0.17 | 1.79 | 6.61 ± 0.24 | 0.37 | 6.19 ± 0.24 | 0.65  | 5.47 ± 0.13 | 3.40  | 4.38 ± 0.08 | 42   |
| H-236 | 6.43 ± 0.03 | 0.37 | 6.30 ± 0.51 | 0.23 | 6.10 ± 0.27 | 0.80  | 5.10 ± 0.08 | 8.04  | 4.50 ± 0.06 | 32   |
| H-237 | 5.52 ± 0.14 | 3.00 | 5.74 ± 1.83 | 0.18 | 5.45 ± 0.33 | 3.55  | 4.97 ± 0.03 | 10.63 | < 4.30      | > 50 |
| H-238 | 6.37 ± 0.17 | 0.43 | 7.24 ± 0.06 | 0.23 | 6.38 ± 0.22 | 0.42  | 5.83 ± 0.22 | 1.50  | 4.58 ± 0.03 | 26   |
| H-239 | 6.25 ± 0.34 | 0.56 | 5.81 ± 1.55 | 0.16 | 5.90 ± 0.15 | 1.26  | 4.97 ± 0.07 | 10.63 | 4.39 ± 0.08 | 40   |
| H-240 | 6.66 ± 0.33 | 0.22 | 6.28 ± 0.53 | 0.14 | 6.39 ± 0.29 | 0.41  | 5.56 ± 0.19 | 2.73  | 4.44 ± 0.11 | 36   |
| H-241 | 6.15 ± 0.14 | 0.70 | 6.08 ± 0.84 | 0.12 | 5.66 ± 0.25 | 2.18  | 4.95 ± 0.04 | 11.35 | 4.76 ± 0.19 | 17   |
| H-242 | 6.79 ± 0.17 | 0.16 | 6.83 ± 0.15 | 0.24 | 6.38 ± 0.32 | 0.41  | 5.41 ± 0.14 | 3.91  | 4.46 ± 0.11 | 35   |
| H-243 | 6.38 ± 0.12 | 0.41 | 6.44 ± 0.36 | 0.25 | 5.83 ± 0.13 | 1.50  | 5.64 ± 0.28 | 2.29  | 4.82 ± 0.10 | 15   |
| H-244 | 6.52 ± 0.05 | 0.30 | 6.20 ± 0.64 | 0.08 | 5.77 ± 0.20 | 1.69  | 5.16 ± 0.11 | 6.94  | < 4.30      | > 50 |
| H-245 | 6.38 ± 0.20 | 0.42 | 6.46 ± 0.35 | 0.18 | 6.44 ± 0.23 | 0.37  | 5.60 ± 0.10 | 2.52  | < 4.30      | > 50 |
| H-247 | 6.54 ± 0.28 | 0.29 | 6.57 ± 0.27 | 0.03 | 6.45 ± 0.23 | 0.35  | 5.82 ± 0.09 | 1.53  | 4.33 ± 0.08 | 47   |
| H-301 | 6.18 ± 0.29 | 0.66 | 6.69 ± 0.21 | 0.20 | 6.68 ± 0.22 | 0.21  | 5.50 ± 0.10 | 3.20  | < 4.30      | > 50 |
| H-302 | 7.46 ± 0.35 | 0.03 | 7.40 ± 0.04 | 0.15 | 6.74 ± 0.30 | 0.18  | 6.39 ± 0.14 | 0.41  | 4.40 ± 0.09 | 40   |
| H-303 | 6.21 ± 0.29 | 0.62 | 6.72 ± 0.19 | 0.14 | 6.83 ± 0.29 | 0.15  | 5.63 ± 0.11 | 2.37  | 4.37 ± 0.12 | 43   |
| H-304 | 6.09 ± 0.24 | 0.81 | 6.22 ± 0.60 | 0.09 | 5.96 ± 0.23 | 1.10  | 5.20 ± 0.12 | 6.33  | < 4.30      | > 50 |
| H-305 | 6.13 ± 0.40 | 0.74 | 6.09 ± 0.82 | 0.14 | 5.96 ± 0.24 | 1.10  | 5.31 ± 0.11 | 4.90  | 4.31 ± 0.09 | 49   |
| H-306 | 6.58 ± 0.45 | 0.26 | 6.35 ± 0.45 | 0.10 | 6.41 ± 0.16 | 0.39  | 5.40 ± 0.09 | 3.97  | < 4.30      | > 50 |
| H-307 | 6.20 ± 0.19 | 0.64 | 6.22 ± 0.61 | 0.16 | 6.15 ± 0.29 | 0.71  | 5.23 ± 0.11 | 5.89  | 4.56 ± 0.06 | 28   |
| H-309 | 6.37 ± 0.14 | 0.42 | 6.68 ± 0.21 | 0.11 | 6.43 ± 0.18 | 0.37  | 5.84 ± 0.12 | 1.43  | 4.32 ± 0.05 | 48   |
| H-310 | 5.91 ± 0.24 | 1.24 | 5.87 ± 1.36 | 0.15 | 5.99 ± 0.22 | 1.02  | 5.18 ± 0.17 | 6.61  | 4.45 ± 0.12 | 35   |

|       |             |      |             |      |             |      |             |       |             |      |
|-------|-------------|------|-------------|------|-------------|------|-------------|-------|-------------|------|
| H-312 | 6.01 ± 0.57 | 0.98 | 6.26 ± 0.55 | 0.15 | 6.35 ± 0.28 | 0.44 | 5.49 ± 0.16 | 3.25  | 4.31 ± 0.09 | 49   |
| H-313 | 6.36 ± 0.24 | 0.44 | 6.52 ± 0.30 | 0.11 | 7.20 ± 0.30 | 0.06 | 5.82 ± 0.17 | 1.53  | < 4.30      | > 50 |
| H-314 | 6.17 ± 0.39 | 0.68 | 6.50 ± 0.32 | 0.21 | 6.10 ± 0.26 | 0.80 | 5.17 ± 0.08 | 6.81  | 4.47 ± 0.10 | 34   |
| H-316 | 6.00 ± 0.51 | 0.99 | 6.86 ± 0.14 | 0.06 | 6.74 ± 0.08 | 0.18 | 5.37 ± 0.12 | 4.25  | 4.49 ± 0.12 | 32   |
| H-318 | 6.07 ± 0.23 | 0.84 | 5.96 ± 1.10 | 0.09 | 5.52 ± 0.19 | 3.04 | 4.98 ± 0.06 | 10.43 | < 4.30      | > 50 |
| H-319 | 6.00 ± 0.35 | 1.01 | 6.17 ± 0.67 | 0.14 | 6.45 ± 0.17 | 0.35 | 5.43 ± 0.09 | 3.73  | 4.45 ± 0.10 | 35   |
| H-320 | 6.35 ± 0.36 | 0.45 | 6.26 ± 0.56 | 0.15 | 6.26 ± 0.18 | 0.55 | 5.32 ± 0.12 | 4.83  | < 4.30      | > 50 |
| H-321 | 5.99 ± 0.28 | 1.03 | 6.26 ± 0.55 | 0.09 | 6.54 ± 0.25 | 0.29 | 5.35 ± 0.12 | 4.43  | 4.38 ± 0.09 | 41   |
| H-324 | 6.45 ± 0.40 | 0.35 | 6.21 ± 0.62 | 0.04 | 6.12 ± 0.21 | 0.76 | 5.40 ± 0.11 | 4.03  | < 4.30      | > 50 |
| H-325 | 6.49 ± 0.26 | 0.33 | 6.31 ± 0.49 | 0.12 | 6.30 ± 0.24 | 0.51 | 5.40 ± 0.09 | 4.00  | 4.31 ± 0.10 | 49   |
| H-326 | 6.15 ± 0.37 | 0.70 | 6.08 ± 0.83 | 0.12 | 6.02 ± 0.20 | 0.95 | 5.13 ± 0.09 | 7.38  | < 4.30      | > 50 |
| H-327 | 7.26 ± 0.35 | 0.05 | 7.06 ± 0.09 | 0.10 | 7.87 ± 0.06 | 0.01 | 6.66 ± 0.14 | 0.22  | 4.35 ± 0.09 | 45   |
| H-329 | 6.40 ± 0.36 | 0.40 | 6.39 ± 0.40 | 0.09 | 6.92 ± 0.26 | 0.12 | 5.84 ± 0.13 | 1.45  | 4.88 ± 0.15 | 13   |
| H-330 | 6.73 ± 0.11 | 0.18 | 5.80 ± 1.57 | 0.15 | 5.97 ± 0.23 | 1.08 | 4.94 ± 0.05 | 11.39 | < 4.30      | > 50 |
| H-331 | 6.73 ± 0.19 | 0.19 | 6.95 ± 0.11 | 0.19 | 6.89 ± 0.20 | 0.13 | 6.05 ± 0.15 | 0.89  | 4.37 ± 0.11 | 42   |
| H-332 | 6.21 ± 0.22 | 0.62 | 6.62 ± 0.24 | 0.05 | 6.61 ± 0.27 | 0.25 | 5.62 ± 0.09 | 2.38  | < 4.30      | > 50 |
| H-333 | 6.60 ± 0.38 | 0.25 | 6.50 ± 0.31 | 0.13 | 6.10 ± 0.28 | 0.80 | 5.43 ± 0.07 | 3.74  | < 4.30      | > 50 |
| H-334 | 6.13 ± 0.17 | 0.74 | 5.99 ± 1.02 | 0.06 | 6.59 ± 0.27 | 0.26 | 5.65 ± 0.08 | 2.23  | 4.51 ± 0.11 | 31   |
| H-335 | 6.19 ± 0.26 | 0.64 | 6.59 ± 0.26 | 0.13 | 6.66 ± 0.27 | 0.22 | 5.72 ± 0.11 | 1.92  | < 4.30      | > 50 |
| H-336 | 6.30 ± 0.21 | 0.50 | 6.41 ± 0.39 | 0.14 | 6.03 ± 0.15 | 0.94 | 5.44 ± 0.07 | 3.66  | 4.30 ± 0.11 | 50   |
| H-337 | 6.33 ± 0.31 | 0.46 | 6.28 ± 0.52 | 0.17 | 6.01 ± 0.20 | 0.98 | 5.14 ± 0.10 | 7.30  | 4.40 ± 0.10 | 40   |
| H-338 | 5.89 ± 0.24 | 1.28 | 6.62 ± 0.24 | 0.10 | 6.96 ± 0.19 | 0.11 | 5.68 ± 0.08 | 2.08  | < 4.30      | > 50 |
| H-339 | 6.31 ± 0.12 | 0.49 | 6.34 ± 0.46 | 0.18 | 6.09 ± 0.27 | 0.81 | 5.12 ± 0.09 | 7.67  | 4.33 ± 0.14 | 47   |
| H-340 | 5.67 ± 0.49 | 2.14 | 5.96 ± 1.10 | 0.28 | 5.55 ± 0.25 | 2.82 | 4.98 ± 0.06 | 10.47 | 4.55 ± 0.14 | 28   |
| H-341 | 6.82 ± 0.26 | 0.15 | 6.57 ± 0.27 | 0.26 | 6.24 ± 0.32 | 0.58 | 5.31 ± 0.10 | 4.92  | 4.40 ± 0.12 | 40   |
| H-342 | 7.30 ± 0.34 | 0.05 | 6.11 ± 0.78 | 0.25 | 6.10 ± 0.28 | 0.79 | 5.09 ± 0.09 | 8.22  | 4.69 ± 0.18 | 20   |
| H-343 | 6.00 ± 0.08 | 1.01 | 6.33 ± 0.47 | 0.22 | 5.96 ± 0.29 | 1.10 | 5.07 ± 0.09 | 8.54  | 4.62 ± 0.16 | 24   |
| H-344 | 6.61 ± 0.17 | 0.24 | 6.47 ± 0.34 | 0.19 | 6.48 ± 0.30 | 0.33 | 5.50 ± 0.15 | 3.15  | 4.56 ± 0.14 | 28   |
| H-345 | 6.89 ± 0.04 | 0.13 | 7.31 ± 0.05 | 0.21 | 6.68 ± 0.28 | 0.21 | 6.01 ± 0.10 | 0.98  | 4.34 ± 0.11 | 46   |
| H-346 | 6.67 ± 0.09 | 0.21 | 6.63 ± 0.23 | 0.18 | 6.51 ± 0.30 | 0.31 | 5.54 ± 0.06 | 2.86  | 4.41 ± 0.18 | 39   |
| H-347 | 5.81 ± 0.12 | 1.55 | 5.94 ± 1.14 | 0.28 | 5.39 ± 0.23 | 4.11 | 4.88 ± 0.05 | 13.28 | 4.51 ± 0.09 | 31   |
| H-348 | 5.71 ± 0.17 | 1.96 | 6.46 ± 0.34 | 0.27 | 5.51 ± 0.23 | 3.11 | 4.83 ± 0.06 | 14.85 | 4.34 ± 0.10 | 46   |
| H-354 | 5.75 ± 0.28 | 1.76 | 5.77 ± 1.71 | 0.06 | 5.84 ± 0.48 | 1.43 | 5.15 ± 0.11 | 7.16  | < 4.30      | > 50 |

The activities of the indicated nitrofurans were assayed against two metronidazole-sensitive (Mz<sup>S</sup>) *G. lamblia* strains (713 and 106) and two metronidazole-resistant (Mz<sup>R</sup>) *G. lamblia* strains (713M3, WB-M2) in a 48 h growth and survival assay with ATP as a read-out. Triazole names refer to the azide core with the first letter (H, Fig. 1) and the alkynes with the number (101-354); Fzd, Furazolidone. Data are mean ± SE of the pEC50 values obtained in at least three independent experiments; EC50 values (in μM) were calculated from the mean pEC50. Cytotoxicity of the nitrofurans was tested against human HeLa epithelial cells in a 48 h growth and survival assay, using AlamarBlue dye reduction as a read-out. Data are mean ± SE of the pCC50 values obtained in at least three independent experiments; CC50 values (in μM) were calculated from the mean pCC50. Compounds with no detectable cytotoxicity at the highest tested concentration (50 μM) are indicated with a pCC50 value of <4.30.

**Table S4. Antigiardial activity and cytotoxicity of new nitropyrroles**

| Name  | <i>Mz<sup>S</sup> G. lamblia</i> |                    |             |                    | <i>Mz<sup>R</sup> G. lamblia</i> |                    |             |                    | HeLa        |      |
|-------|----------------------------------|--------------------|-------------|--------------------|----------------------------------|--------------------|-------------|--------------------|-------------|------|
|       | 713                              |                    | 106         |                    | 713M3                            |                    | WB-M2       |                    | pCC50       | CC50 |
|       | pEC50                            | EC50<br>( $\mu$ M) | pEC50       | EC50<br>( $\mu$ M) | pEC50                            | EC50<br>( $\mu$ M) | pEC50       | EC50<br>( $\mu$ M) |             |      |
| Mz    | 5.70 ± 0.05                      | 2.01               | 5.44 ± 0.22 | 3.60               | 4.30 ± 0.05                      | 50.22              | 4.09 ± 0.08 | 80.40              | < 4.30      | > 50 |
| I-101 | 5.58 ± 0.16                      | 2.62               | 6.20 ± 0.11 | 0.63               | 5.76 ± 0.31                      | 1.75               | 5.09 ± 0.08 | 8.19               | < 4.30      | > 50 |
| I-102 | 5.19 ± 0.10                      | 6.49               | 5.91 ± 0.10 | 1.22               | 5.73 ± 0.27                      | 1.86               | 4.99 ± 0.06 | 10.31              | 4.32 ± 0.09 | 48   |
| I-103 | 5.62 ± 0.11                      | 2.43               | 6.62 ± 0.11 | 0.24               | 6.09 ± 0.33                      | 0.82               | 5.00 ± 0.05 | 9.92               | 4.37 ± 0.10 | 43   |
| I-104 | 5.23 ± 0.09                      | 5.89               | 5.83 ± 0.13 | 1.48               | 5.85 ± 0.36                      | 1.41               | 5.00 ± 0.05 | 9.96               | 4.40 ± 0.12 | 40   |
| I-105 | 5.37 ± 0.02                      | 4.23               | 5.97 ± 0.21 | 1.07               | 5.91 ± 0.33                      | 1.24               | 5.06 ± 0.06 | 8.74               | < 4.30      | > 50 |
| I-106 | 5.22 ± 0.20                      | 6.07               | 5.25 ± 0.15 | 5.62               | 5.51 ± 0.39                      | 3.11               | 5.00 ± 0.12 | 10.08              | < 4.30      | > 50 |
| I-107 | 5.58 ± 0.20                      | 2.65               | 5.89 ± 0.07 | 1.28               | 5.75 ± 0.17                      | 1.76               | 4.84 ± 0.05 | 14.40              | < 4.30      | > 50 |
| I-108 | 5.47 ± 0.04                      | 3.39               | 5.76 ± 0.24 | 1.75               | 6.29 ± 0.28                      | 0.52               | 5.01 ± 0.04 | 9.81               | 4.41 ± 0.07 | 39   |
| I-109 | 5.29 ± 0.19                      | 5.13               | 5.56 ± 0.09 | 2.75               | 5.77 ± 0.32                      | 1.70               | 4.95 ± 0.05 | 11.35              | < 4.30      | > 50 |
| I-110 | 5.38 ± 0.20                      | 4.17               | 5.93 ± 0.22 | 1.17               | 6.05 ± 0.16                      | 0.90               | 4.98 ± 0.09 | 10.39              | < 4.30      | > 50 |
| I-111 | 5.33 ± 0.09                      | 4.71               | 6.01 ± 0.04 | 0.99               | 6.05 ± 0.30                      | 0.90               | 5.17 ± 0.10 | 6.82               | < 4.30      | > 50 |
| I-112 | 5.52 ± 0.07                      | 3.04               | 5.95 ± 0.25 | 1.13               | 6.02 ± 0.20                      | 0.96               | 5.02 ± 0.06 | 9.55               | 4.40 ± 0.08 | 40   |
| I-113 | 5.99 ± 0.17                      | 1.02               | 6.77 ± 0.08 | 0.17               | 6.27 ± 0.19                      | 0.54               | 5.10 ± 0.07 | 7.88               | 4.33 ± 0.06 | 46   |
| I-115 | 5.88 ± 0.46                      | 1.31               | 6.42 ± 0.21 | 0.38               | 5.72 ± 0.21                      | 1.93               | 5.00 ± 0.05 | 10.00              | 4.37 ± 0.09 | 42   |
| I-116 | 5.65 ± 0.18                      | 2.26               | 5.91 ± 0.16 | 1.24               | 5.83 ± 0.30                      | 1.50               | 4.95 ± 0.05 | 11.27              | 4.32 ± 0.09 | 48   |
| I-117 | 5.11 ± 0.19                      | 7.85               | 5.80 ± 0.24 | 1.58               | 5.65 ± 0.33                      | 2.25               | 4.88 ± 0.06 | 13.23              | < 4.30      | > 50 |
| I-118 | 5.11 ± 0.02                      | 7.82               | 6.17 ± 0.28 | 0.68               | 5.77 ± 0.23                      | 1.69               | 4.97 ± 0.07 | 10.62              | 4.65 ± 0.09 | 22   |
| I-119 | 5.13 ± 0.15                      | 7.41               | 5.22 ± 0.23 | 6.03               | 5.51 ± 0.31                      | 3.11               | 4.78 ± 0.04 | 16.60              | 4.32 ± 0.12 | 48   |
| I-120 | 5.63 ± 0.10                      | 2.36               | 6.13 ± 0.20 | 0.74               | 5.95 ± 0.22                      | 1.14               | 4.98 ± 0.04 | 10.59              | < 4.30      | > 50 |
| I-121 | 5.51 ± 0.15                      | 3.07               | 5.73 ± 0.21 | 1.88               | 5.89 ± 0.26                      | 1.28               | 5.12 ± 0.13 | 7.67               | 4.30 ± 0.12 | 50   |
| I-122 | 5.07 ± 0.04                      | 8.51               | 5.81 ± 0.17 | 1.56               | 5.61 ± 0.26                      | 2.47               | 4.88 ± 0.07 | 13.18              | 4.43 ± 0.10 | 37   |
| I-123 | 7.15 ± 0.20                      | 0.07               | 7.12 ± 0.08 | 0.08               | 6.55 ± 0.21                      | 0.29               | 6.17 ± 0.14 | 0.68               | 4.31 ± 0.12 | 49   |
| I-124 | 5.29 ± 0.05                      | 5.17               | 5.69 ± 0.10 | 2.05               | 5.58 ± 0.22                      | 2.66               | 4.93 ± 0.06 | 11.75              | < 4.30      | > 50 |
| I-125 | 4.93 ± 0.10                      | 11.75              | 5.61 ± 0.12 | 2.45               | 5.79 ± 0.14                      | 1.61               | 4.82 ± 0.04 | 15.19              | 4.52 ± 0.09 | 30   |
| I-126 | 5.53 ± 0.17                      | 2.97               | 6.03 ± 0.16 | 0.94               | 5.62 ± 0.23                      | 2.39               | 5.00 ± 0.09 | 10.08              | < 4.30      | > 50 |
| I-127 | 5.57 ± 0.17                      | 2.69               | 6.07 ± 0.16 | 0.84               | 6.23 ± 0.23                      | 0.59               | 4.80 ± 0.06 | 16.03              | 4.30 ± 0.06 | 50   |
| I-128 | 5.33 ± 0.29                      | 4.71               | 5.34 ± 0.23 | 4.61               | 5.77 ± 0.13                      | 1.69               | 4.86 ± 0.08 | 13.86              | 4.32 ± 0.07 | 48   |
| I-129 | 5.70 ± 0.33                      | 2.00               | 5.64 ± 0.18 | 2.27               | 5.64 ± 0.17                      | 2.30               | 4.80 ± 0.05 | 16.03              | 4.66 ± 0.10 | 22   |
| I-130 | 5.57 ± 0.12                      | 2.67               | 6.45 ± 0.16 | 0.35               | 6.00 ± 0.13                      | 1.00               | 4.97 ± 0.10 | 10.84              | 4.54 ± 0.08 | 29   |
| I-131 | 5.81 ± 0.05                      | 1.54               | 6.19 ± 0.22 | 0.65               | 6.22 ± 0.22                      | 0.61               | 5.38 ± 0.12 | 4.14               | 4.47 ± 0.08 | 34   |
| I-132 | 5.21 ± 0.26                      | 6.17               | 5.51 ± 0.24 | 3.11               | 5.97 ± 0.28                      | 1.06               | 4.89 ± 0.05 | 12.83              | 4.46 ± 0.11 | 35   |
| I-133 | 5.66 ± 0.46                      | 2.20               | 5.64 ± 0.06 | 2.29               | 6.19 ± 0.25                      | 0.64               | 4.83 ± 0.08 | 14.96              | 4.65 ± 0.08 | 22   |
| I-134 | 5.73 ± 0.12                      | 1.86               | 5.96 ± 0.13 | 1.09               | 5.93 ± 0.20                      | 1.18               | 4.81 ± 0.05 | 15.49              | 4.31 ± 0.05 | 49   |
| I-135 | 6.26 ± 0.09                      | 0.55               | 6.43 ± 0.16 | 0.37               | 6.15 ± 0.15                      | 0.70               | 5.45 ± 0.08 | 3.53               | 4.70 ± 0.08 | 20   |
| I-136 | 5.11 ± 0.09                      | 7.73               | 5.30 ± 0.23 | 5.01               | 5.60 ± 0.17                      | 2.51               | 4.83 ± 0.05 | 14.96              | 4.61 ± 0.11 | 25   |
| I-137 | 5.99 ± 0.11                      | 1.02               | 6.49 ± 0.19 | 0.32               | 6.50 ± 0.17                      | 0.31               | 5.34 ± 0.19 | 4.59               | 4.56 ± 0.08 | 28   |
| I-138 | 5.65 ± 0.19                      | 2.24               | 5.68 ± 0.23 | 2.11               | 5.65 ± 0.31                      | 2.24               | 4.71 ± 0.01 | 19.35              | 4.58 ± 0.11 | 27   |
| I-139 | 5.45 ± 0.33                      | 3.58               | 5.88 ± 0.21 | 1.33               | 5.90 ± 0.25                      | 1.27               | 4.90 ± 0.10 | 12.54              | < 4.30      | > 50 |
| I-141 | 5.91 ± 0.33                      | 1.22               | 6.44 ± 0.16 | 0.36               | 6.07 ± 0.19                      | 0.85               | 4.85 ± 0.08 | 14.13              | 4.53 ± 0.08 | 30   |
| I-142 | 5.38 ± 0.15                      | 4.21               | 5.87 ± 0.06 | 1.34               | 6.00 ± 0.25                      | 1.00               | 4.93 ± 0.07 | 11.66              | 4.71 ± 0.10 | 20   |
| I-143 | 5.74 ± 0.16                      | 1.81               | 6.35 ± 0.11 | 0.44               | 6.01 ± 0.23                      | 0.97               | 4.99 ± 0.05 | 10.35              | 4.46 ± 0.09 | 35   |
| I-144 | 5.00 ± 0.04                      | 10.09              | 5.23 ± 0.14 | 5.93               | 5.42 ± 0.18                      | 3.84               | 4.73 ± 0.03 | 18.62              | < 4.30      | > 50 |
| I-145 | 5.47 ± 0.14                      | 3.42               | 5.41 ± 0.13 | 3.86               | 5.62 ± 0.25                      | 2.39               | 4.75 ± 0.05 | 17.92              | 4.31 ± 0.08 | 49   |
| I-146 | 5.29 ± 0.12                      | 5.08               | 5.41 ± 0.14 | 3.89               | 5.59 ± 0.20                      | 2.57               | 4.72 ± 0.01 | 19.23              | 4.51 ± 0.05 | 31   |
| I-147 | 5.76 ± 0.22                      | 1.74               | 5.54 ± 0.28 | 2.88               | 5.62 ± 0.18                      | 2.39               | 4.83 ± 0.07 | 14.96              | 4.50 ± 0.08 | 32   |
| I-148 | 5.60 ± 0.24                      | 2.50               | 5.94 ± 0.19 | 1.14               | 5.92 ± 0.26                      | 1.19               | 4.82 ± 0.05 | 15.02              | 4.64 ± 0.08 | 23   |
| I-149 | 5.30 ± 0.15                      | 5.01               | 5.46 ± 0.02 | 3.49               | 5.44 ± 0.14                      | 3.66               | 4.74 ± 0.04 | 18.06              | 4.49 ± 0.07 | 33   |
| I-150 | 5.49 ± 0.15                      | 3.21               | 5.54 ± 0.24 | 2.88               | 5.76 ± 0.29                      | 1.75               | 4.81 ± 0.06 | 15.61              | 4.45 ± 0.11 | 36   |
| I-151 | 5.54 ± 0.15                      | 2.86               | 5.67 ± 0.12 | 2.14               | 5.92 ± 0.24                      | 1.20               | 4.82 ± 0.08 | 15.19              | 4.50 ± 0.10 | 31   |
| I-152 | 5.42 ± 0.14                      | 3.78               | 5.74 ± 0.23 | 1.83               | 5.65 ± 0.22                      | 2.24               | 4.89 ± 0.08 | 12.93              | 4.42 ± 0.07 | 38   |
| I-153 | 5.67 ± 0.18                      | 2.12               | 5.61 ± 0.16 | 2.44               | 5.84 ± 0.30                      | 1.46               | 5.04 ± 0.27 | 9.05               | 4.69 ± 0.12 | 20   |
| I-154 | 5.44 ± 0.09                      | 3.65               | 5.68 ± 0.19 | 2.09               | 6.32 ± 0.26                      | 0.48               | 4.96 ± 0.09 | 10.88              | 4.49 ± 0.09 | 33   |
| I-155 | 5.64 ± 0.15                      | 2.30               | 6.15 ± 0.20 | 0.70               | 6.22 ± 0.22                      | 0.60               | 5.02 ± 0.09 | 9.59               | 4.35 ± 0.10 | 45   |
| I-156 | 5.82 ± 0.09                      | 1.51               | 6.33 ± 0.15 | 0.46               | 6.14 ± 0.19                      | 0.72               | 5.14 ± 0.07 | 7.33               | < 4.30      | > 50 |

|       |             |       |             |      |             |      |             |       |             |      |
|-------|-------------|-------|-------------|------|-------------|------|-------------|-------|-------------|------|
| I-157 | 5.80 ± 0.15 | 1.58  | 6.02 ± 0.18 | 0.95 | 6.13 ± 0.10 | 0.74 | 4.92 ± 0.10 | 12.07 | 4.31 ± 0.06 | 49   |
| I-158 | 5.45 ± 0.19 | 3.52  | 5.80 ± 0.20 | 1.57 | 6.08 ± 0.29 | 0.84 | 4.92 ± 0.07 | 12.12 | 4.51 ± 0.09 | 31   |
| I-159 | 5.65 ± 0.17 | 2.22  | 5.68 ± 0.16 | 2.07 | 5.91 ± 0.25 | 1.23 | 4.96 ± 0.08 | 11.01 | < 4.30      | > 50 |
| I-160 | 5.25 ± 0.12 | 5.65  | 5.69 ± 0.22 | 2.06 | 6.12 ± 0.27 | 0.75 | 4.95 ± 0.10 | 11.18 | 4.36 ± 0.09 | 44   |
| I-161 | 5.86 ± 0.24 | 1.38  | 5.77 ± 0.23 | 1.69 | 6.09 ± 0.22 | 0.82 | 4.99 ± 0.05 | 10.19 | 4.37 ± 0.07 | 42   |
| I-162 | 5.92 ± 0.08 | 1.20  | 5.98 ± 0.21 | 1.06 | 6.07 ± 0.27 | 0.85 | 5.13 ± 0.09 | 7.36  | < 4.30      | > 50 |
| I-163 | 6.00 ± 0.14 | 1.01  | 6.21 ± 0.17 | 0.62 | 6.00 ± 0.29 | 1.01 | 5.01 ± 0.08 | 9.77  | 4.52 ± 0.09 | 30   |
| I-201 | 5.28 ± 0.06 | 5.21  | 6.06 ± 0.14 | 0.86 | 5.95 ± 0.35 | 1.14 | 5.01 ± 0.07 | 9.70  | 4.42 ± 0.13 | 38   |
| I-202 | 6.31 ± 0.21 | 0.49  | 6.49 ± 0.22 | 0.32 | 6.10 ± 0.20 | 0.80 | 5.37 ± 0.11 | 4.23  | 4.34 ± 0.09 | 46   |
| I-203 | 5.89 ± 0.17 | 1.28  | 6.28 ± 0.15 | 0.52 | 5.78 ± 0.27 | 1.65 | 4.98 ± 0.04 | 10.55 | < 4.30      | > 50 |
| I-204 | 5.79 ± 0.16 | 1.64  | 6.98 ± 0.23 | 0.11 | 6.05 ± 0.24 | 0.90 | 5.19 ± 0.11 | 6.43  | 4.35 ± 0.09 | 45   |
| I-205 | 5.57 ± 0.13 | 2.69  | 5.72 ± 0.23 | 1.89 | 6.23 ± 0.24 | 0.59 | 5.16 ± 0.16 | 6.85  | < 4.30      | > 50 |
| I-206 | 5.90 ± 0.17 | 1.27  | 5.99 ± 0.15 | 1.02 | 5.91 ± 0.20 | 1.22 | 4.78 ± 0.06 | 16.66 | < 4.30      | > 50 |
| I-207 | 5.76 ± 0.11 | 1.72  | 6.02 ± 0.11 | 0.96 | 5.62 ± 0.24 | 2.39 | 4.99 ± 0.04 | 10.15 | 4.45 ± 0.12 | 35   |
| I-208 | 4.88 ± 0.09 | 13.28 | 5.55 ± 0.22 | 2.82 | 5.61 ± 0.28 | 2.44 | 4.91 ± 0.03 | 12.35 | 4.76 ± 0.05 | 17   |
| I-209 | 5.48 ± 0.31 | 3.29  | 6.54 ± 0.13 | 0.29 | 5.56 ± 0.30 | 2.77 | 4.76 ± 0.04 | 17.58 | 4.39 ± 0.10 | 41   |
| I-210 | 5.75 ± 0.10 | 1.76  | 6.25 ± 0.17 | 0.56 | 6.04 ± 0.27 | 0.92 | 5.02 ± 0.08 | 9.62  | < 4.30      | > 50 |
| I-211 | 5.61 ± 0.31 | 2.44  | 5.96 ± 0.12 | 1.10 | 5.94 ± 0.28 | 1.14 | 4.93 ± 0.03 | 11.75 | 4.56 ± 0.12 | 28   |
| I-212 | 5.50 ± 0.35 | 3.16  | 5.76 ± 0.24 | 1.75 | 5.79 ± 0.31 | 1.63 | 5.02 ± 0.15 | 9.48  | < 4.30      | > 50 |
| I-213 | 5.42 ± 0.09 | 3.77  | 5.67 ± 0.13 | 2.16 | 5.86 ± 0.31 | 1.38 | 5.03 ± 0.05 | 9.44  | 4.32 ± 0.13 | 48   |
| I-214 | 4.91 ± 0.11 | 12.21 | 5.57 ± 0.14 | 2.68 | 5.81 ± 0.16 | 1.54 | 4.85 ± 0.05 | 14.18 | < 4.30      | > 50 |
| I-215 | 5.76 ± 0.14 | 1.74  | 6.18 ± 0.11 | 0.66 | 6.12 ± 0.25 | 0.76 | 5.33 ± 0.10 | 4.73  | 4.41 ± 0.11 | 39   |
| I-216 | 4.74 ± 0.03 | 18.41 | 5.26 ± 0.15 | 5.50 | 5.35 ± 0.25 | 4.50 | 4.78 ± 0.04 | 16.60 | 4.60 ± 0.14 | 25   |
| I-218 | 5.44 ± 0.13 | 3.63  | 5.71 ± 0.15 | 1.96 | 5.86 ± 0.26 | 1.38 | 4.96 ± 0.08 | 10.88 | 4.31 ± 0.06 | 49   |
| I-219 | 5.48 ± 0.14 | 3.31  | 6.19 ± 0.22 | 0.65 | 5.82 ± 0.13 | 1.51 | 4.93 ± 0.05 | 11.64 | 4.60 ± 0.07 | 25   |
| I-220 | 5.70 ± 0.21 | 1.99  | 6.06 ± 0.13 | 0.86 | 6.51 ± 0.29 | 0.31 | 5.37 ± 0.10 | 4.27  | 4.98 ± 0.11 | 11   |
| I-221 | 5.87 ± 0.09 | 1.36  | 6.41 ± 0.12 | 0.39 | 5.91 ± 0.27 | 1.23 | 4.84 ± 0.06 | 14.40 | < 4.30      | > 50 |
| I-222 | 5.30 ± 0.13 | 5.06  | 6.01 ± 0.19 | 0.98 | 6.37 ± 0.22 | 0.42 | 5.10 ± 0.09 | 7.97  | 4.57 ± 0.09 | 27   |
| I-223 | 5.87 ± 0.13 | 1.35  | 6.29 ± 0.08 | 0.52 | 6.12 ± 0.19 | 0.76 | 4.74 ± 0.03 | 18.27 | 4.73 ± 0.09 | 19   |
| I-224 | 5.56 ± 0.21 | 2.78  | 5.87 ± 0.17 | 1.35 | 5.68 ± 0.12 | 2.09 | 4.81 ± 0.06 | 15.63 | 4.49 ± 0.09 | 32   |
| I-225 | 5.83 ± 0.07 | 1.48  | 6.31 ± 0.24 | 0.49 | 5.84 ± 0.25 | 1.46 | 4.77 ± 0.05 | 17.18 | < 4.30      | > 50 |
| I-226 | 5.53 ± 0.08 | 2.95  | 6.41 ± 0.24 | 0.39 | 5.95 ± 0.22 | 1.12 | 4.91 ± 0.08 | 12.21 | 4.49 ± 0.09 | 32   |
| I-227 | 5.57 ± 0.33 | 2.71  | 5.98 ± 0.22 | 1.05 | 5.75 ± 0.23 | 1.79 | 4.89 ± 0.11 | 12.83 | 4.45 ± 0.07 | 36   |
| I-228 | 5.51 ± 0.47 | 3.09  | 5.79 ± 0.25 | 1.61 | 5.90 ± 0.25 | 1.26 | 5.02 ± 0.09 | 9.62  | 4.44 ± 0.08 | 36   |
| I-229 | 5.51 ± 0.13 | 3.07  | 5.81 ± 0.18 | 1.56 | 5.89 ± 0.24 | 1.29 | 4.97 ± 0.07 | 10.80 | 4.54 ± 0.08 | 29   |
| I-230 | 5.69 ± 0.15 | 2.06  | 5.96 ± 0.08 | 1.10 | 6.01 ± 0.26 | 0.97 | 5.04 ± 0.06 | 9.19  | < 4.30      | > 50 |
| I-231 | 5.53 ± 0.09 | 2.95  | 5.63 ± 0.14 | 2.33 | 5.65 ± 0.22 | 2.24 | 4.90 ± 0.08 | 12.69 | 4.50 ± 0.09 | 31   |
| I-234 | 5.37 ± 0.23 | 4.23  | 5.87 ± 0.24 | 1.34 | 5.93 ± 0.19 | 1.17 | 4.85 ± 0.09 | 14.23 | 4.80 ± 0.09 | 16   |
| I-235 | 5.66 ± 0.17 | 2.17  | 5.65 ± 0.23 | 2.26 | 5.82 ± 0.25 | 1.53 | 4.80 ± 0.06 | 15.91 | 4.40 ± 0.08 | 40   |
| I-236 | 6.02 ± 0.22 | 0.95  | 6.10 ± 0.22 | 0.79 | 5.93 ± 0.18 | 1.16 | 4.95 ± 0.13 | 11.35 | 4.46 ± 0.08 | 35   |
| I-237 | 6.01 ± 0.36 | 0.97  | 6.24 ± 0.21 | 0.58 | 6.80 ± 0.29 | 0.16 | 5.18 ± 0.14 | 6.58  | 4.58 ± 0.10 | 26   |
| I-238 | 5.71 ± 0.45 | 1.95  | 5.37 ± 0.12 | 4.30 | 5.30 ± 0.23 | 4.98 | 4.70 ± 0.00 | 19.95 | < 4.30      | > 50 |
| I-239 | 5.58 ± 0.14 | 2.63  | 5.48 ± 0.21 | 3.29 | 5.76 ± 0.24 | 1.75 | 4.90 ± 0.07 | 12.69 | 4.37 ± 0.07 | 43   |
| I-240 | 6.09 ± 0.09 | 0.81  | 5.97 ± 0.18 | 1.07 | 6.46 ± 0.13 | 0.34 | 5.41 ± 0.22 | 3.92  | 4.73 ± 0.07 | 19   |
| I-241 | 5.49 ± 0.18 | 3.27  | 5.88 ± 0.24 | 1.33 | 5.94 ± 0.14 | 1.15 | 4.96 ± 0.10 | 11.05 | 4.56 ± 0.10 | 27   |
| I-242 | 6.31 ± 0.07 | 0.49  | 6.61 ± 0.08 | 0.25 | 6.33 ± 0.37 | 0.47 | 5.57 ± 0.08 | 2.69  | 4.41 ± 0.08 | 39   |
| I-243 | 5.82 ± 0.15 | 1.53  | 6.09 ± 0.18 | 0.82 | 6.21 ± 0.30 | 0.61 | 5.22 ± 0.16 | 6.08  | < 4.30      | > 50 |
| I-244 | 6.13 ± 0.21 | 0.74  | 6.62 ± 0.22 | 0.24 | 5.96 ± 0.22 | 1.09 | 5.24 ± 0.17 | 5.71  | < 4.30      | > 50 |
| I-245 | 5.66 ± 0.15 | 2.18  | 5.95 ± 0.17 | 1.12 | 5.81 ± 0.32 | 1.54 | 4.97 ± 0.10 | 10.72 | < 4.30      | > 50 |
| I-247 | 6.10 ± 0.29 | 0.80  | 6.19 ± 0.28 | 0.64 | 5.89 ± 0.09 | 1.30 | 5.61 ± 0.14 | 2.45  | 4.33 ± 0.07 | 46   |
| I-301 | 5.90 ± 0.44 | 1.26  | 6.74 ± 0.20 | 0.18 | 5.91 ± 0.37 | 1.24 | 5.04 ± 0.07 | 9.05  | 4.53 ± 0.10 | 29   |
| I-302 | 6.70 ± 0.62 | 0.20  | 5.66 ± 0.07 | 2.21 | 5.51 ± 0.38 | 3.11 | 4.78 ± 0.05 | 16.47 | < 4.30      | > 50 |
| I-303 | 5.55 ± 0.38 | 2.80  | 6.86 ± 0.20 | 0.14 | 5.97 ± 0.22 | 1.08 | 5.09 ± 0.09 | 8.19  | 4.36 ± 0.11 | 44   |
| I-304 | 6.39 ± 0.18 | 0.41  | 5.85 ± 0.08 | 1.43 | 5.99 ± 0.24 | 1.04 | 5.19 ± 0.11 | 6.43  | < 4.30      | > 50 |
| I-305 | 5.59 ± 0.45 | 2.59  | 6.49 ± 0.12 | 0.32 | 5.92 ± 0.23 | 1.20 | 5.17 ± 0.09 | 6.73  | < 4.30      | > 50 |
| I-306 | 6.02 ± 0.29 | 0.95  | 7.70 ± 0.14 | 0.02 | 6.26 ± 0.20 | 0.56 | 6.53 ± 0.17 | 0.30  | 4.34 ± 0.11 | 46   |
| I-307 | 5.31 ± 0.35 | 4.94  | 5.23 ± 0.24 | 5.89 | 5.72 ± 0.32 | 1.89 | 4.93 ± 0.08 | 11.70 | < 4.30      | > 50 |
| I-308 | 5.64 ± 0.47 | 2.27  | 5.98 ± 0.10 | 1.04 | 5.60 ± 0.26 | 2.53 | 4.93 ± 0.04 | 11.66 | 4.43 ± 0.10 | 37   |
| I-309 | 5.39 ± 0.15 | 4.04  | 6.18 ± 0.13 | 0.66 | 5.69 ± 0.22 | 2.04 | 5.01 ± 0.06 | 9.70  | < 4.30      | > 50 |
| I-310 | 5.29 ± 0.34 | 5.13  | 5.63 ± 0.17 | 2.34 | 5.50 ± 0.34 | 3.18 | 4.83 ± 0.07 | 14.73 | < 4.30      | > 50 |
| I-311 | 6.72 ± 0.30 | 0.19  | 6.32 ± 0.21 | 0.48 | 6.21 ± 0.23 | 0.62 | 5.12 ± 0.06 | 7.61  | 4.66 ± 0.06 | 22   |

|       |             |      |             |      |             |      |             |       |             |      |
|-------|-------------|------|-------------|------|-------------|------|-------------|-------|-------------|------|
| I-312 | 5.11 ± 0.11 | 7.70 | 5.75 ± 0.13 | 1.80 | 5.98 ± 0.32 | 1.06 | 4.98 ± 0.08 | 10.59 | 4.41 ± 0.10 | 39   |
| I-313 | 5.70 ± 0.08 | 1.98 | 6.78 ± 0.06 | 0.17 | 6.24 ± 0.31 | 0.58 | 5.56 ± 0.13 | 2.79  | < 4.30      | > 50 |
| I-314 | 5.24 ± 0.09 | 5.80 | 6.63 ± 0.14 | 0.23 | 5.89 ± 0.27 | 1.30 | 4.89 ± 0.05 | 12.88 | 4.53 ± 0.10 | 30   |
| I-315 | 5.28 ± 0.30 | 5.29 | 6.07 ± 0.10 | 0.86 | 6.05 ± 0.35 | 0.89 | 5.01 ± 0.06 | 9.85  | < 4.30      | > 50 |
| I-316 | 5.37 ± 0.07 | 4.30 | 6.24 ± 0.16 | 0.58 | 5.69 ± 0.20 | 2.07 | 5.00 ± 0.11 | 10.12 | 4.31 ± 0.09 | 49   |
| I-317 | 5.58 ± 0.16 | 2.63 | 5.85 ± 0.01 | 1.42 | 5.59 ± 0.36 | 2.55 | 4.90 ± 0.04 | 12.69 | < 4.30      | > 50 |
| I-318 | 5.06 ± 0.10 | 8.78 | 5.23 ± 0.17 | 5.96 | 5.47 ± 0.27 | 3.41 | 4.78 ± 0.05 | 16.72 | < 4.30      | > 50 |
| I-319 | 5.42 ± 0.13 | 3.83 | 5.82 ± 0.11 | 1.52 | 5.99 ± 0.30 | 1.03 | 5.00 ± 0.08 | 10.04 | < 4.30      | > 50 |
| I-320 | 5.17 ± 0.13 | 6.76 | 6.72 ± 0.04 | 0.19 | 5.93 ± 0.36 | 1.17 | 5.02 ± 0.10 | 9.48  | 4.33 ± 0.09 | 47   |
| I-323 | 5.27 ± 0.30 | 5.41 | 5.76 ± 0.20 | 1.75 | 6.06 ± 0.30 | 0.87 | 5.13 ± 0.11 | 7.44  | 4.32 ± 0.08 | 48   |
| I-324 | 5.36 ± 0.40 | 4.37 | 6.36 ± 0.11 | 0.44 | 6.02 ± 0.38 | 0.95 | 5.00 ± 0.06 | 9.92  | 4.35 ± 0.10 | 45   |
| I-325 | 5.02 ± 0.03 | 9.62 | 5.34 ± 0.13 | 4.57 | 5.61 ± 0.28 | 2.47 | 4.83 ± 0.07 | 14.68 | < 4.30      | > 50 |
| I-326 | 5.49 ± 0.06 | 3.24 | 6.04 ± 0.08 | 0.91 | 5.69 ± 0.27 | 2.07 | 4.91 ± 0.07 | 12.45 | 5.22 ± 0.04 | 6    |
| I-327 | 5.65 ± 0.12 | 2.22 | 6.34 ± 0.09 | 0.46 | 5.88 ± 0.21 | 1.33 | 5.13 ± 0.08 | 7.38  | 4.58 ± 0.03 | 26   |
| I-328 | 5.18 ± 0.19 | 6.66 | 5.73 ± 0.09 | 1.88 | 5.28 ± 0.35 | 5.21 | 4.87 ± 0.09 | 13.65 | 5.29 ± 0.02 | 5    |
| I-330 | 5.84 ± 0.25 | 1.43 | 5.91 ± 0.13 | 1.24 | 5.57 ± 0.35 | 2.69 | 4.78 ± 0.07 | 16.47 | < 4.30      | > 50 |
| I-331 | 5.51 ± 0.18 | 3.09 | 5.61 ± 0.14 | 2.47 | 5.51 ± 0.20 | 3.07 | 4.85 ± 0.04 | 14.29 | < 4.30      | > 50 |
| I-332 | 5.43 ± 0.25 | 3.72 | 6.21 ± 0.16 | 0.62 | 6.41 ± 0.21 | 0.39 | 5.19 ± 0.12 | 6.43  | 4.41 ± 0.09 | 39   |
| I-333 | 5.26 ± 0.09 | 5.54 | 6.15 ± 0.21 | 0.71 | 5.52 ± 0.27 | 3.04 | 4.85 ± 0.06 | 14.26 | < 4.30      | > 50 |
| I-334 | 5.43 ± 0.09 | 3.69 | 6.17 ± 0.16 | 0.68 | 6.15 ± 0.28 | 0.71 | 5.08 ± 0.11 | 8.32  | < 4.30      | > 50 |
| I-335 | 5.01 ± 0.05 | 9.77 | 5.51 ± 0.21 | 3.07 | 5.84 ± 0.31 | 1.45 | 4.90 ± 0.07 | 12.59 | < 4.30      | > 50 |
| I-336 | 5.59 ± 0.10 | 2.59 | 6.54 ± 0.14 | 0.29 | 5.47 ± 0.50 | 3.41 | 4.79 ± 0.04 | 16.28 | < 4.30      | > 50 |
| I-337 | 6.36 ± 0.05 | 0.44 | 6.90 ± 0.19 | 0.12 | 5.85 ± 0.23 | 1.41 | 5.44 ± 0.10 | 3.62  | < 4.30      | > 50 |
| I-339 | 5.69 ± 0.27 | 2.06 | 5.87 ± 0.25 | 1.36 | 5.63 ± 0.22 | 2.33 | 4.96 ± 0.08 | 10.88 | < 4.30      | > 50 |
| I-340 | 5.44 ± 0.12 | 3.63 | 6.09 ± 0.19 | 0.81 | 5.98 ± 0.32 | 1.05 | 4.98 ± 0.09 | 10.47 | 4.33 ± 0.07 | 46   |
| I-341 | 5.68 ± 0.11 | 2.07 | 6.12 ± 0.09 | 0.77 | 5.64 ± 0.15 | 2.28 | 4.96 ± 0.07 | 10.92 | < 4.30      | > 50 |
| I-342 | 5.30 ± 0.17 | 4.97 | 5.61 ± 0.11 | 2.44 | 5.42 ± 0.28 | 3.77 | 4.92 ± 0.08 | 11.98 | < 4.30      | > 50 |
| I-343 | 5.81 ± 0.16 | 1.54 | 5.85 ± 0.22 | 1.40 | 5.58 ± 0.33 | 2.65 | 4.97 ± 0.07 | 10.80 | < 4.30      | > 50 |
| I-344 | 5.59 ± 0.15 | 2.55 | 6.01 ± 0.07 | 0.97 | 5.67 ± 0.31 | 2.15 | 5.04 ± 0.06 | 9.19  | < 4.30      | > 50 |
| I-345 | 5.51 ± 0.41 | 3.11 | 6.21 ± 0.17 | 0.62 | 5.79 ± 0.21 | 1.64 | 4.98 ± 0.05 | 10.51 | < 4.30      | > 50 |
| I-346 | 6.14 ± 0.11 | 0.73 | 6.48 ± 0.10 | 0.33 | 5.94 ± 0.21 | 1.14 | 5.07 ± 0.09 | 8.45  | < 4.30      | > 50 |
| I-347 | 5.34 ± 0.18 | 4.61 | 6.15 ± 0.20 | 0.71 | 5.49 ± 0.44 | 3.21 | 4.84 ± 0.10 | 14.62 | < 4.30      | > 50 |
| I-348 | 5.93 ± 0.10 | 1.18 | 6.16 ± 0.19 | 0.69 | 6.13 ± 0.21 | 0.74 | 4.95 ± 0.08 | 11.31 | 4.36 ± 0.06 | 43   |
| I-349 | 6.22 ± 0.07 | 0.61 | 6.91 ± 0.20 | 0.12 | 6.39 ± 0.25 | 0.41 | 5.36 ± 0.12 | 4.37  | 4.59 ± 0.10 | 26   |
| I-350 | 5.75 ± 0.07 | 1.78 | 6.17 ± 0.09 | 0.67 | 6.01 ± 0.14 | 0.97 | 5.05 ± 0.08 | 8.91  | 4.49 ± 0.08 | 32   |
| I-351 | 6.33 ± 0.13 | 0.47 | 6.57 ± 0.14 | 0.27 | 6.26 ± 0.27 | 0.55 | 5.23 ± 0.13 | 5.93  | < 4.30      | > 50 |
| I-352 | 5.99 ± 0.12 | 1.02 | 5.92 ± 0.13 | 1.19 | 6.11 ± 0.27 | 0.78 | 5.07 ± 0.07 | 8.51  | < 4.30      | > 50 |
| I-353 | 5.28 ± 0.34 | 5.29 | 5.91 ± 0.12 | 1.22 | 5.57 ± 0.28 | 2.72 | 4.86 ± 0.05 | 13.80 | 4.43 ± 0.10 | 37   |

The activities of the indicated nitropyrroles were assayed against two metronidazole-sensitive ( $Mz^S$ ) *G. lamblia* strains (713 and 106) and two metronidazole-resistant ( $Mz^R$ ) *G. lamblia* strains (713M3 and WB-M2) in a 48 h growth and survival assay with ATP as a read-out. Triazole names refer to the azide core with the first letter (I, see Fig. 1) and the alkynes with the number (101-353); Mz, Metronidazole. Data are mean ± SE of the pEC50 values obtained in at least three independent experiments; EC50 values (in  $\mu\text{M}$ ) were calculated from the mean pEC50. Cytotoxicity of the nitropyrroles was tested against human HeLa epithelial cells in a 48 h growth and survival assay, using AlamarBlue dye reduction as a read-out. Data are mean ± SE of the pCC50 values obtained in at least three independent experiments; CC50 values (in  $\mu\text{M}$ ) were calculated from the mean pCC50. Compounds with no detectable cytotoxicity at the highest tested concentration (50  $\mu\text{M}$ ) are indicated with a pCC50 value of <4.30.
